# Supplementary material
Source: ML conference proceedings conference paper supplement (https://openreview.net/forum?id=Uh0T_Q0pg7r)
Supplement: supplementary_material [file attachment]

## Sheet: Splicing
	EI_MSE_BS1_Exp1	EI_MSE_BS1_Exp2	EI_MSE_BS1_Exp3	MaxVar_BS1_MSE_Exp1	MaxVar_BS1_MSE_Exp2	MaxVar_BS1_MSE_Exp3	Rand_BS1_MSE_Exp1	Rand_BS1_MSE_Exp2	Rand_BS1_MSE_Exp3
0	0.131882	0.124129	0.153836	0.152485	0.139342	0.139393	0.128162	0.140726	0.137735
1	0.130107	0.14202	0.160799	0.153481	0.137396	0.137388	0.128633	0.131573	0.159528
2	0.132238	0.133278	0.145365	0.128203	0.130266	0.127448	0.132147	0.130471	0.133074
3	0.146892	0.132651	0.140572	0.115592	0.134121	0.142561	0.157936	0.128925	0.125677
4	0.136582	0.13433	0.143932	0.119533	0.132634	0.127118	0.126816	0.123765	0.124176
5	0.140774	0.127392	0.137829	0.124893	0.128758	0.137687	0.116953	0.126904	0.128825
6	0.133326	0.132178	0.150251	0.123241	0.129294	0.128755	0.124308	0.116952	0.127275
7	0.14659	0.131358	0.137129	0.126086	0.133468	0.134655	0.14616	0.122154	0.14454
8	0.142906	0.126337	0.168606	0.1234	0.126226	0.121606	0.133216	0.123749	0.129646
9	0.138685	0.146241	0.126745	0.132645	0.13096	0.128367	0.14279	0.128977	0.127511
10	0.129484	0.131491	0.151933	0.119137	0.130477	0.119597	0.137293	0.134423	0.131846
11	0.145812	0.134971	0.130394	0.124336	0.130138	0.135656	0.12821	0.127762	0.143448
12	0.138922	0.135285	0.135927	0.128708	0.132078	0.126189	0.128251	0.134594	0.130836
13	0.132362	0.124041	0.157915	0.138087	0.130054	0.128976	0.154668	0.121501	0.146288
14	0.127152	0.13149	0.124145	0.117068	0.148936	0.113685	0.132383	0.113747	0.131699
15	0.143094	0.119706	0.124339	0.129025	0.120214	0.11998	0.142776	0.121615	0.150172
16	0.133883	0.121312	0.140071	0.121033	0.122799	0.122952	0.120904	0.125607	0.141671
17	0.135082	0.123498	0.129927	0.125636	0.124829	0.12754	0.136808	0.115881	0.146022
18	0.134696	0.125962	0.125906	0.116877	0.13276	0.129569	0.122811	0.110576	0.16466
19	0.130623	0.124956	0.119833	0.119914	0.12447	0.113295	0.152569	0.121105	0.134752
20	0.131282	0.127778	0.114742	0.123933	0.131375	0.120372	0.111312	0.125406	0.12465
21	0.125104	0.128232	0.122314	0.11415	0.126144	0.11681	0.126886	0.116267	0.147079
22	0.138583	0.145165	0.128758	0.129776	0.126268	0.10935	0.134896	0.116445	0.148654
23	0.1277	0.119449	0.131981	0.112799	0.127071	0.113662	0.130184	0.125699	0.128065
24	0.139511	0.12982	0.131458	0.118272	0.123635	0.115462	0.145308	0.120235	0.130228
25	0.120672	0.13136	0.132553	0.128553	0.124007	0.106019	0.136741	0.115987	0.125543
26	0.126672	0.124166	0.119951	0.110598	0.128059	0.104745	0.130505	0.11687	0.125507
27	0.121464	0.123002	0.119705	0.114316	0.124956	0.104735	0.131205	0.118131	0.12709
28	0.135265	0.120036	0.127489	0.124538	0.121991	0.120023	0.139794	0.121758	0.12847
29	0.136048	0.122355	0.141241	0.126583	0.125773	0.131379	0.158321	0.119701	0.123727
30	0.117699	0.139549	0.148749	0.128176	0.123984	0.108279	0.128241	0.114964	0.128819
31	0.127811	0.126227	0.111633	0.123696	0.126137	0.111061	0.12246	0.115511	0.123931
32	0.129732	0.121973	0.122936	0.113509	0.126991	0.103701	0.134775	0.120306	0.117542
33	0.125983	0.129182	0.124994	0.12266	0.124097	0.103866	0.14052	0.126918	0.125365
34	0.117175	0.114809	0.120883	0.123859	0.137001	0.110205	0.121118	0.116864	0.143566
35	0.121297	0.139496	0.123484	0.114291	0.136234	0.112456	0.129765	0.113231	0.136861
36	0.122915	0.120421	0.112873	0.120689	0.127117	0.122667	0.133133	0.121119	0.13668
37	0.125235	0.121643	0.117844	0.12384	0.12338	0.112472	0.127759	0.124349	0.12652
38	0.122114	0.129255	0.116955	0.121985	0.127954	0.106654	0.13616	0.110655	0.134951
39	0.118811	0.11834	0.114026	0.11171	0.122579	0.117449	0.129118	0.119531	0.12817
40	0.118893	0.129176	0.113341	0.127856	0.137859	0.103824	0.126054	0.115097	0.117311
41	0.120236	0.127871	0.105698	0.110506	0.126241	0.116855	0.127959	0.115717	0.122647
42	0.122628	0.123815	0.118701	0.12505	0.137922	0.126582	0.123775	0.121988	0.116874
43	0.120662	0.124066	0.128718	0.128686	0.126535	0.106809	0.121593	0.120539	0.106868
44	0.11866	0.119446	0.108295	0.125556	0.129083	0.102881	0.125828	0.1309	0.111264
45	0.115787	0.143101	0.108714	0.125078	0.127608	0.117906	0.11514	0.128046	0.123944
46	0.11133	0.121358	0.120273	0.117257	0.121773	0.104855	0.12426	0.112002	0.115783
47	0.116066	0.121602	0.107706	0.119513	0.128618	0.103871	0.130584	0.125649	0.119227
48	0.112984	0.114521	0.106983	0.119264	0.126755	0.103343	0.135109	0.119243	0.120997
49	0.117455	0.121999	0.1056	0.124037	0.128848	0.112035	0.112917	0.131936	0.118249
50	0.118295	0.114486	0.110968	0.117849	0.123281	0.105861	0.136738	0.11791	0.110318
51	0.114298	0.117908	0.13621	0.125168	0.124223	0.119983	0.120811	0.108262	0.126243
52	0.114083	0.118087	0.113092	0.119103	0.12652	0.101943	0.132572	0.11531	0.115681
53	0.116977	0.112732	0.113196	0.118107	0.126652	0.134146	0.126397	0.106668	0.115922
54	0.116959	0.113514	0.102986	0.127055	0.124727	0.109415	0.147258	0.106495	0.113628
55	0.121504	0.121671	0.108497	0.121741	0.140093	0.0981404	0.111591	0.10928	0.111505
56	0.118769	0.113588	0.104389	0.120133	0.118458	0.111866	0.111201	0.116673	0.139458
57	0.115605	0.108512	0.119873	0.123281	0.116773	0.103347	0.116858	0.11934	0.122521
58	0.107733	0.118194	0.112809	0.111187	0.121901	0.121985	0.108815	0.118651	0.11055
59	0.11844	0.116055	0.108	0.113627	0.122955	0.105353	0.1378	0.117357	0.132885
60	0.104044	0.117598	0.111078	0.107449	0.137989	0.112639	0.139308	0.10676	0.114622
61	0.112914	0.108408	0.1107	0.118824	0.120012	0.101901	0.117043	0.125863	0.122634
62	0.113928	0.120531	0.114096	0.116298	0.128452	0.0992037	0.133012	0.120093	0.105433
63	0.110327	0.107872	0.113891	0.113853	0.124205	0.102636	0.128343	0.112267	0.105483
64	0.120126	0.110929	0.110744	0.111222	0.121723	0.111156	0.126905	0.11807	0.128244
65	0.114067	0.108275	0.113281	0.111604	0.119363	0.109035	0.138333	0.114974	0.120739
66	0.11074	0.118909	0.110934	0.109516	0.122918	0.109703	0.120725	0.111684	0.107792
67	0.118407	0.113675	0.107027	0.111218	0.127449	0.109633	0.117616	0.122799	0.105726
68	0.101655	0.111039	0.117686	0.117847	0.118463	0.106679	0.133834	0.111254	0.10146
69	0.106826	0.111084	0.105689	0.113572	0.122356	0.108685	0.138206	0.129233	0.119177
70	0.110078	0.11587	0.10433	0.106769	0.118465	0.113689	0.126166	0.118378	0.112083
71	0.10305	0.118246	0.115053	0.110852	0.11831	0.112406	0.110382	0.115919	0.119275
72	0.109404	0.110775	0.114056	0.106726	0.121128	0.112919	0.122445	0.108949	0.121241
73	0.103232	0.112419	0.119665	0.121049	0.127494	0.115311	0.129194	0.122004	0.108296
74	0.105882	0.113429	0.103984	0.106077	0.120534	0.110774	0.112013	0.113615	0.104821
75	0.116004	0.113214	0.113837	0.112431	0.119471	0.110569	0.114454	0.121177	0.116557
76	0.106342	0.107593	0.11177	0.111132	0.118831	0.105688	0.130658	0.116657	0.109007
77	0.103082	0.109653	0.101524	0.11528	0.120087	0.107976	0.115848	0.120921	0.104005
78	0.111837	0.115788	0.121818	0.107399	0.115702	0.113583	0.123934	0.114634	0.124029
79	0.107956	0.108598	0.112806	0.120071	0.118239	0.114813	0.138543	0.114656	0.103618
80	0.10202	0.11649	0.117824	0.108024	0.12067	0.116015	0.118267	0.106451	0.0955195
81	0.107484	0.105523	0.10473	0.113919	0.120724	0.114456	0.112796	0.109922	0.10736
82	0.103255	0.116562	0.107886	0.118394	0.121493	0.109868	0.121064	0.108572	0.109718
83	0.10513	0.105591	0.106337	0.111084	0.12145	0.112989	0.12989	0.104039	0.122946
84	0.100188	0.110873	0.105201	0.117303	0.124887	0.112238	0.104555	0.105932	0.113145
85	0.0980852	0.114088	0.103018	0.110802	0.120864	0.109588	0.122131	0.105992	0.127841
86	0.102044	0.107207	0.105391	0.109033	0.129202	0.110247	0.133875	0.114009	0.117119
87	0.107848	0.115218	0.11917	0.103116	0.122655	0.115449	0.146357	0.111881	0.114936
88	0.104795	0.112073	0.107979	0.117126	0.119677	0.118719	0.132521	0.105355	0.0996322
89	0.100204	0.11933	0.0998623	0.113889	0.122731	0.109706	0.119459	0.102919	0.0992082
90	0.102445	0.110854	0.10847	0.110863	0.119813	0.110576	0.143432	0.110596	0.116361
91	0.0968161	0.106299	0.10841	0.105629	0.122254	0.122989	0.126738	0.105139	0.105193
92	0.10516	0.111244	0.108165	0.106079	0.11364	0.109274	0.135431	0.111467	0.119466
93	0.0977095	0.108613	0.105817	0.111325	0.121491	0.113751	0.106702	0.108665	0.121959
94	0.111649	0.115272	0.107941	0.111479	0.122975	0.111885	0.135969	0.105119	0.111182
95	0.0986209	0.10905	0.0994838	0.108163	0.120267	0.109386	0.130173	0.105535	0.106867
96	0.0986447	0.113636	0.109113	0.11611	0.121461	0.107359	0.124709	0.107363	0.111967
97	0.0992054	0.108793	0.108596	0.108093	0.117963	0.110772	0.12688	0.111188	0.120853
98	0.111139	0.109535	0.105035	0.112404	0.125004	0.115158	0.133282	0.107893	0.109775
99	0.105654	0.112814	0.108328	0.107838	0.124851	0.115427	0.117926	0.105311	0.104349
100	0.100659	0.116137	0.113424	0.114694	0.123633	0.118861	0.113744	0.1107	0.109231
101	0.0998052	0.105575	0.109899	0.109221	0.121616	0.114626	0.114247	0.130057	0.100995
102	0.0997858	0.105045	0.110472	0.119724	0.115473	0.109456	0.10935	0.105931	0.114807
103	0.10094	0.108568	0.100058	0.110494	0.11939	0.117944	0.113946	0.105643	0.107632
104	0.0980457	0.11245	0.101326	0.110673	0.11859	0.109478	0.114079	0.110345	0.117955
105	0.0959249	0.104415	0.102839	0.10891	0.120113	0.107733	0.123614	0.110973	0.118492
106	0.0967679	0.108394	0.100628	0.104132	0.11743	0.112422	0.114831	0.110699	0.106774
107	0.0973425	0.101494	0.101438	0.115885	0.129073	0.106663	0.134122	0.113262	0.105728
108	0.102881	0.110567	0.101698	0.111866	0.120906	0.106111	0.131948	0.111003	0.11982
109	0.0932875	0.102523	0.102432	0.1071	0.121698	0.106772	0.118589	0.108163	0.10849
110	0.101959	0.118093	0.106976	0.11546	0.118407	0.102585	0.123135	0.112727	0.102873
111	0.0984645	0.113235	0.110445	0.112255	0.119931	0.111489	0.118075	0.110479	0.106927
112	0.0932729	0.106729	0.10522	0.111846	0.119385	0.108801	0.129545	0.122736	0.104585
113	0.0977752	0.102888	0.106594	0.125329	0.125675	0.108125	0.128741	0.112911	0.101259
114	0.0991036	0.109369	0.102027	0.112849	0.116452	0.104948	0.114118	0.111792	0.103478
115	0.0917943	0.10861	0.0991198	0.118223	0.117197	0.10717	0.120342	0.13518	0.102362
116	0.101935	0.112947	0.102371	0.108283	0.12562	0.10945	0.118944	0.119351	0.105588
117	0.0985019	0.110732	0.101102	0.119491	0.112018	0.105607	0.109762	0.10619	0.114507
118	0.0970799	0.108895	0.0989421	0.111425	0.117368	0.109704	0.133442	0.113392	0.0986135
119	0.100174	0.11033	0.100404	0.109463	0.115054	0.1059	0.11868	0.110349	0.102885
120	0.095884	0.105361	0.101311	0.107233	0.112391	0.106406	0.121595	0.103789	0.101461
121	0.0973905	0.102815	0.106315	0.109488	0.119534	0.106723	0.115171	0.104144	0.108292
122	0.100918	0.108426	0.104004	0.114065	0.115325	0.104646	0.124558	0.109759	0.106144
123	0.101696	0.102607	0.10045	0.111474	0.112903	0.10406	0.121644	0.104137	0.099367
124	0.0956374	0.100833	0.10654	0.111391	0.115983	0.111388	0.110766	0.113458	0.0993353
125	0.0947591	0.109284	0.10496	0.112268	0.1173	0.106452	0.122175	0.122472	0.0977884
126	0.0987311	0.101212	0.10855	0.10795	0.112084	0.106436	0.110987	0.111317	0.0931483
127	0.0955373	0.109557	0.108955	0.108664	0.112997	0.111707	0.125095	0.106753	0.115652
128	0.101116	0.105367	0.100276	0.109014	0.112165	0.104281	0.123145	0.106784	0.100385
129	0.104605	0.103384	0.104437	0.113079	0.114603	0.106926	0.125397	0.1122	0.09251
130	0.0964376	0.104641	0.104489	0.112192	0.117732	0.105477	0.118245	0.113242	0.101225
131	0.0977139	0.103423	0.0990446	0.105521	0.114445	0.10605	0.110608	0.105955	0.0945137
132	0.0938359	0.106094	0.104545	0.110358	0.109685	0.11333	0.119573	0.108922	0.0997082
133	0.0907123	0.108719	0.109971	0.104978	0.10831	0.104514	0.104543	0.105858	0.0958795
134	0.0888572	0.105923	0.102391	0.108487	0.119413	0.108564	0.115232	0.108969	0.0936411
135	0.0871933	0.10825	0.101687	0.105735	0.120773	0.108915	0.116877	0.112709	0.0956857
136	0.0863642	0.101778	0.102088	0.110083	0.115984	0.108583	0.110166	0.106203	0.0930706
137	0.0912958	0.100062	0.103683	0.11154	0.108359	0.118576	0.111786	0.12343	0.107477
138	0.0945484	0.103154	0.105367	0.110776	0.113806	0.109273	0.133857	0.127082	0.0966726
139	0.0868924	0.101675	0.102749	0.109759	0.113535	0.100487	0.115219	0.115565	0.0976857
140	0.0895767	0.101591	0.106724	0.10282	0.11902	0.104862	0.110396	0.10296	0.0965329
141	0.0887686	0.0986039	0.102253	0.112028	0.119881	0.106479	0.113382	0.117753	0.103243
142	0.0962293	0.100443	0.106739	0.115821	0.116957	0.10556	0.119817	0.106085	0.095644
143	0.0927712	0.0982752	0.0999271	0.108642	0.114841	0.108363	0.124746	0.103962	0.098309
144	0.0916405	0.108524	0.105672	0.114386	0.10951	0.10551	0.109698	0.126375	0.0939713
145	0.0901904	0.106778	0.103792	0.111921	0.116072	0.106369	0.110633	0.109663	0.102916
146	0.0910767	0.101093	0.109284	0.106732	0.119556	0.104878	0.122935	0.107524	0.106531
147	0.0957693	0.105934	0.10136	0.105797	0.111721	0.102695	0.11887	0.102651	0.103067
148	0.0976512	0.100876	0.104943	0.116205	0.129185	0.106865	0.116186	0.104022	0.0940956
149	0.0969909	0.105024	0.104799	0.108093	0.110837	0.11153	0.131884	0.113427	0.103436
150	0.0903257	0.101861	0.105561	0.104997	0.111861	0.106407	0.11644	0.119696	0.0904092
151	0.0914571	0.102736	0.106333	0.105532	0.114585	0.104931	0.109545	0.113973	0.0932527
152	0.0918479	0.105794	0.101781	0.115873	0.110278	0.102583	0.125912	0.105244	0.0882542
153	0.0903179	0.1045	0.0987675	0.108163	0.110476	0.106611	0.116564	0.102225	0.100349
154	0.0938907	0.106396	0.105794	0.115089	0.111986	0.102957	0.107152	0.10094	0.0939848
155	0.0931412	0.0975552	0.10973	0.113081	0.109001	0.112006	0.11908	0.105386	0.102426
156	0.0958666	0.0999604	0.117521	0.107666	0.111561	0.105422	0.107238	0.127424	0.092203
157	0.094288	0.100267	0.104314	0.113315	0.110109	0.106353	0.111594	0.108903	0.0926079
158	0.089676	0.109021	0.101763	0.111606	0.110677	0.102275	0.120023	0.101974	0.102468
159	0.0973137	0.100608	0.101581	0.111355	0.114383	0.102831	0.125408	0.108225	0.106775
160	0.0952399	0.102544	0.101251	0.108693	0.115815	0.104974	0.108832	0.116005	0.0973289
161	0.0899748	0.100581	0.10376	0.115407	0.115181	0.107077	0.111635	0.105472	0.109383
162	0.0955706	0.0996916	0.102956	0.108274	0.110218	0.115545	0.10523	0.102924	0.107136
163	0.0893423	0.102232	0.0993503	0.108661	0.111919	0.108568	0.123132	0.115238	0.0996864
164	0.0916275	0.104693	0.0996239	0.11281	0.110561	0.105043	0.108852	0.104402	0.0880398
165	0.0885105	0.102807	0.107948	0.118165	0.112872	0.104331	0.121872	0.107991	0.0908414
166	0.0941332	0.0997553	0.104854	0.108458	0.115636	0.110217	0.117838	0.117733	0.0996889
167	0.0906405	0.105813	0.0982018	0.110429	0.111052	0.105536	0.104087	0.110862	0.0962806
168	0.0905977	0.0947833	0.102496	0.110366	0.116249	0.109593	0.116289	0.108455	0.104576
169	0.0959237	0.10263	0.102321	0.109694	0.119021	0.102825	0.103472	0.106987	0.110648
170	0.0908646	0.102992	0.0987453	0.116942	0.114666	0.108222	0.112071	0.110268	0.0969576
171	0.0907946	0.104712	0.1032	0.107912	0.113716	0.105805	0.115106	0.114651	0.100145
172	0.0908881	0.100063	0.0952223	0.109612	0.107735	0.109969	0.107878	0.113329	0.0915643
173	0.0906297	0.103753	0.0971587	0.115245	0.119487	0.106349	0.116115	0.120183	0.0948585
174	0.0895708	0.0980331	0.0955795	0.112397	0.120329	0.108144	0.123427	0.111523	0.101341
175	0.0945276	0.101003	0.101265	0.108417	0.118863	0.104209	0.125508	0.111233	0.10321
176	0.0925137	0.098081	0.103849	0.113071	0.122846	0.105235	0.121118	0.108736	0.0958769
177	0.106007	0.10751	0.0972015	0.10796	0.111316	0.10377	0.11518	0.105815	0.0965648
178	0.0953202	0.104629	0.0984023	0.110158	0.111346	0.103935	0.125671	0.115282	0.0999789
179	0.0876171	0.103831	0.0994948	0.110651	0.118551	0.106155	0.124075	0.101042	0.0951266
180	0.0935342	0.10211	0.101178	0.10811	0.110684	0.106611	0.105367	0.0989236	0.0881106
181	0.0900436	0.0996745	0.0961095	0.110474	0.113397	0.107087	0.108248	0.113803	0.112207
182	0.0978526	0.0959682	0.0942893	0.108808	0.115255	0.123186	0.113821	0.109362	0.106974
183	0.0961479	0.0996317	0.102766	0.10708	0.129218	0.108077	0.113984	0.107841	0.0872257
184	0.0893289	0.0961472	0.102262	0.101808	0.115325	0.11554	0.0998115	0.107432	0.0947531
185	0.0861003	0.0979026	0.0987685	0.112618	0.110514	0.105387	0.121693	0.105242	0.0890324
186	0.0886055	0.0960434	0.100953	0.113813	0.113968	0.106464	0.107211	0.109833	0.0882938
187	0.0895633	0.0985535	0.106672	0.108405	0.12316	0.103537	0.102807	0.103158	0.0913177
188	0.0914564	0.103525	0.100983	0.111648	0.116467	0.106939	0.108718	0.098956	0.0904389
189	0.0934796	0.0977024	0.100464	0.109449	0.118138	0.0997595	0.102179	0.124196	0.0920502
190	0.0909116	0.098552	0.104911	0.10323	0.110903	0.105289	0.100616	0.100869	0.0903732
191	0.0851906	0.106329	0.0955144	0.10582	0.118088	0.110682	0.102823	0.103176	0.0932178
192	0.0896815	0.0998096	0.104019	0.123757	0.12485	0.108266	0.107993	0.0963216	0.0921751
193	0.089146	0.0934897	0.095952	0.10538	0.109768	0.10607	0.122055	0.0976124	0.0854032
194	0.0939192	0.103666	0.0969639	0.102895	0.111027	0.102589	0.122836	0.108159	0.0955798
195	0.0899661	0.0988997	0.101602	0.10918	0.118839	0.106787	0.108123	0.1043	0.0936083
196	0.0892259	0.0962877	0.0950832	0.106216	0.111432	0.107132	0.102018	0.104282	0.0886871
197	0.089066	0.103128	0.0981686	0.107898	0.110223	0.103726	0.102552	0.104491	0.0924719
198	0.0926876	0.0980672	0.0956959	0.10721	0.107911	0.109474	0.115549	0.104948	0.0880022
199	0.0842098	0.0933528	0.104775	0.102649	0.113734	0.105972	0.109345	0.106338	0.101823
200	0.0917388	0.0905715	0.0984732	0.111004	0.120773	0.105975	0.116738	0.0995832	0.0935943
201	0.08677	0.0933651	0.0977192	0.102937	0.116459	0.103921	0.105867	0.107767	0.0901971
202	0.0853647	0.0950503	0.104189	0.102672	0.109024	0.103747	0.111325	0.10017	0.0902586
203	0.091318	0.0965847	0.0971809	0.107244	0.112009	0.103518	0.105866	0.104035	0.0895506
204	0.0919719	0.0960657	0.101318	0.101265	0.112089	0.107411	0.0992123	0.0989247	0.0897747
205	0.0842319	0.100057	0.103873	0.102483	0.111411	0.102091	0.106875	0.105656	0.0873774
206	0.0874248	0.103115	0.102777	0.100782	0.12475	0.106273	0.109664	0.109917	0.0938878
207	0.0935982	0.0979529	0.0953542	0.107191	0.11838	0.106552	0.105128	0.0955002	0.0994163
208	0.086349	0.0981065	0.105773	0.099225	0.107212	0.109042	0.111673	0.103169	0.0921305
209	0.0885855	0.100156	0.0981288	0.101492	0.108825	0.105373	0.101149	0.110925	0.0931274
210	0.0860575	0.0973599	0.106159	0.102241	0.113702	0.106105	0.103159	0.105091	0.0937526
211	0.0944686	0.0972688	0.100076	0.104943	0.111731	0.10889	0.113746	0.106271	0.0916867
212	0.103446	0.0986097	0.0976303	0.108403	0.109179	0.10674	0.108219	0.0963997	0.0932795
213	0.0854233	0.0965412	0.0973553	0.102509	0.115726	0.107463	0.102549	0.108479	0.0913959
214	0.0878407	0.0954177	0.0976783	0.10284	0.121027	0.108988	0.0990998	0.107898	0.0867363
215	0.0957699	0.098415	0.0977467	0.0994146	0.106433	0.102135	0.105074	0.102497	0.0963896
216	0.0899112	0.0960484	0.104344	0.102725	0.1122	0.106627	0.105432	0.113827	0.0991437
217	0.0911968	0.0952763	0.0986762	0.101555	0.10983	0.104316	0.110218	0.110933	0.0875215
218	0.0940396	0.0930636	0.100629	0.100929	0.105653	0.103645	0.0990517	0.10074	0.0891683
219	0.0889093	0.0970918	0.0985977	0.101099	0.106724	0.112579	0.100492	0.106443	0.0959849
220	0.0898031	0.0948384	0.0995611	0.0961438	0.105814	0.107172	0.101564	0.11639	0.0875088
221	0.0917809	0.0966701	0.0986416	0.102138	0.10793	0.107329	0.1288	0.106795	0.0875122
222	0.0875022	0.101947	0.0974821	0.100386	0.114605	0.104997	0.102876	0.12177	0.091063
223	0.085672	0.0946456	0.0925287	0.103885	0.116683	0.102826	0.103701	0.109848	0.0939289
224	0.089547	0.0978767	0.103061	0.105763	0.11037	0.10989	0.0996137	0.1148	0.0939784
225	0.0889652	0.103774	0.107557	0.105541	0.109842	0.112535	0.107929	0.1035	0.0894338
226	0.0872941	0.0953896	0.0981014	0.106825	0.108975	0.103009	0.0999682	0.10578	0.0973755
227	0.0884393	0.103215	0.0980879	0.107928	0.108892	0.108513	0.0984572	0.108776	0.0961885
228	0.0912908	0.0950641	0.0953169	0.104919	0.106567	0.107807	0.126407	0.110007	0.0960491
229	0.0905647	0.103494	0.0984761	0.101322	0.107847	0.111778	0.115944	0.116235	0.0936744
230	0.0886769	0.0985806	0.0974024	0.102458	0.108231	0.104642	0.106409	0.123384	0.091109
231	0.0886233	0.0941287	0.0972903	0.104584	0.116818	0.110251	0.120904	0.104625	0.0963784
232	0.0857305	0.092987	0.0956006	0.104851	0.107559	0.105403	0.102283	0.102546	0.0946463
233	0.0882343	0.0986629	0.0931798	0.0995188	0.110493	0.109918	0.115627	0.110101	0.0868802
234	0.0883213	0.092888	0.0977652	0.101292	0.108551	0.103461	0.120527	0.115682	0.0938114
235	0.0868498	0.0966167	0.0990805	0.107721	0.11313	0.105928	0.0987756	0.108311	0.100339
236	0.0866777	0.0936955	0.0921853	0.109938	0.10621	0.105298	0.0957116	0.104543	0.0925132
237	0.0899732	0.0915311	0.0925536	0.103518	0.113556	0.105985	0.116674	0.103602	0.0898755
238	0.0898624	0.0955028	0.0997246	0.101372	0.108476	0.105358	0.119969	0.101251	0.0949426
239	0.089963	0.096915	0.0981389	0.10423	0.136651	0.102573	0.106979	0.104349	0.0922055
240	0.0925428	0.0931166	0.0996434	0.101861	0.113714	0.104803	0.104153	0.117944	0.0904639
241	0.085959	0.0933282	0.0971718	0.104389	0.132488	0.103589	0.102446	0.102654	0.0918982
242	0.0939358	0.096675	0.0948656	0.104007	0.107409	0.107709	0.103724	0.109819	0.0952702
243	0.0918305	0.0914106	0.102232	0.10443	0.108523	0.104761	0.132234	0.119747	0.0944703
244	0.0923089	0.0914854	0.0981307	0.0990742	0.102543	0.10402	0.105938	0.113985	0.0839914
245	0.0911025	0.0932788	0.0970011	0.102148	0.103185	0.104104	0.0976571	0.111325	0.0909518
246	0.0896186	0.0915053	0.099974	0.0981843	0.112798	0.101984	0.103377	0.114792	0.0899914
247	0.0951105	0.0952866	0.105461	0.103166	0.116256	0.107659	0.120302	0.119958	0.0895643
248	0.0880252	0.0943797	0.095638	0.104547	0.107579	0.107073	0.10814	0.112409	0.0908147
249	0.0917392	0.100489	0.0941323	0.101583	0.109851	0.10609	0.107402	0.0977667	0.0931489
250	0.090464	0.0956251	0.0945682	0.102766	0.111657	0.105452	0.131349	0.116648	0.0916475
251	0.0877058	0.0914942	0.0924858	0.100289	0.114113	0.106524	0.116158	0.114573	0.0886699
252	0.0991388	0.0928707	0.0940473	0.111479	0.106694	0.103874	0.0957093	0.110669	0.0883291
253	0.0944998	0.096662	0.0930828	0.103122	0.108022	0.103738	0.100685	0.110388	0.086965
254	0.089888	0.0948835	0.0936505	0.10113	0.106245	0.106789	0.0908635	0.106085	0.0929416
255	0.0923244	0.0909843	0.0996491	0.102684	0.103417	0.10704	0.109837	0.109711	0.0902333
256	0.093661	0.0956218	0.0962706	0.0993773	0.109015	0.107028	0.113353	0.101115	0.0922509
257	0.0978082	0.0969952	0.0971803	0.10372	0.114462	0.108706	0.112344	0.116572	0.100625
258	0.0990223	0.0940054	0.101291	0.101511	0.112866	0.113541	0.107037	0.114049	0.102071
259	0.0991758	0.0943253	0.0933851	0.101645	0.106349	0.104901	0.10802	0.108591	0.087489
260	0.096021	0.0899215	0.0958322	0.101698	0.10226	0.103911	0.105175	0.114249	0.0903555
261	0.0950552	0.0935373	0.0900495	0.102173	0.104526	0.112017	0.119317	0.113956	0.0929968
262	0.0901501	0.0928596	0.0973876	0.10522	0.106399	0.105834	0.103525	0.107838	0.0903623
263	0.0879571	0.0984046	0.0968653	0.102205	0.105169	0.104952	0.119783	0.1015	0.0878799
264	0.0940204	0.101159	0.0983776	0.100464	0.106182	0.10352	0.0977943	0.110438	0.0907641
265	0.0942022	0.0950652	0.0953098	0.103991	0.105314	0.104252	0.106039	0.106252	0.0969147
266	0.088834	0.095165	0.0979609	0.101586	0.108066	0.106716	0.112319	0.107145	0.092012
267	0.0945343	0.0892407	0.0952151	0.10191	0.110575	0.109762	0.115501	0.107556	0.0893775
268	0.0883092	0.0951996	0.0972274	0.109978	0.1049	0.102373	0.102404	0.107866	0.089138
269	0.0961266	0.0945802	0.0946527	0.10673	0.105781	0.100378	0.112765	0.112458	0.0974227
270	0.0931908	0.0939779	0.0981812	0.103298	0.108255	0.0975373	0.122356	0.106783	0.0957703
271	0.0929014	0.0899294	0.0958209	0.096669	0.103711	0.104011	0.0988423	0.114271	0.0932994
272	0.0945676	0.0982755	0.104724	0.0983195	0.10194	0.109566	0.102391	0.103263	0.0886552
273	0.09388	0.0932634	0.0944604	0.0995471	0.106516	0.102327	0.0983076	0.106349	0.0951306
274	0.0928669	0.0904919	0.0929692	0.102444	0.104111	0.111637	0.104927	0.106757	0.0863446
275	0.101898	0.0939633	0.0970632	0.0975588	0.109005	0.100279	0.110962	0.102534	0.0899649
276	0.101655	0.0932219	0.0953183	0.0969023	0.104121	0.105539	0.109157	0.113094	0.093158
277	0.109059	0.0965576	0.0922395	0.100278	0.104635	0.103821	0.0895193	0.115269	0.0900399
278	0.100101	0.0980551	0.0955031	0.104148	0.102172	0.100964	0.122431	0.10386	0.0928788
279	0.0943848	0.0942738	0.0905559	0.101858	0.107118	0.0992141	0.109362	0.103374	0.0883517
280	0.0902256	0.101459	0.0929112	0.102366	0.106867	0.109479	0.0978014	0.108382	0.0912672
281	0.0992386	0.103598	0.0927629	0.104302	0.108188	0.102913	0.115089	0.102049	0.0892779
282	0.0996523	0.100337	0.0956528	0.1009	0.107043	0.102419	0.109895	0.102574	0.0880401
283	0.0944705	0.0954644	0.0934701	0.0998792	0.110846	0.103226	0.110172	0.114399	0.0860133
284	0.0895037	0.0952071	0.0943842	0.102416	0.102912	0.101405	0.0989041	0.107192	0.0878639
285	0.097221	0.0971008	0.0952411	0.0991802	0.11682	0.109083	0.0973942	0.101479	0.09124
286	0.0994903	0.100364	0.0971979	0.106098	0.107891	0.0987008	0.102911	0.0995445	0.085755
287	0.0964359	0.0956968	0.0955379	0.102944	0.121087	0.102071	0.100743	0.101074	0.0931305
288	0.0938696	0.0965822	0.0946565	0.101437	0.108296	0.100874	0.0980524	0.107836	0.0898553
289	0.0926594	0.0983824	0.0944238	0.101754	0.108695	0.107563	0.0940602	0.105361	0.09957
290	0.0913562	0.100151	0.094286	0.106495	0.105786	0.0996285	0.0896108	0.105477	0.0928341
291	0.0917204	0.0927056	0.0918293	0.11092	0.105405	0.100668	0.101763	0.102602	0.093907
292	0.0946463	0.0977368	0.097022	0.102708	0.110599	0.11418	0.095352	0.10768	0.0895746
293	0.0983493	0.0940277	0.0943515	0.104259	0.108846	0.106064	0.100364	0.111491	0.0932594
294	0.0977058	0.0990032	0.0998119	0.10092	0.104536	0.101596	0.103722	0.100781	0.094835
295	0.0909018	0.0984485	0.0943477	0.106836	0.108355	0.102587	0.0934062	0.118641	0.0900402
296	0.085254	0.0955572	0.0942851	0.10207	0.104876	0.103384	0.109326	0.102167	0.0897883
297	0.0911087	0.0991461	0.099313	0.101995	0.104789	0.109531	0.101189	0.104857	0.0879165
298	0.11074	0.0939962	0.0953649	0.107815	0.107855	0.101168	0.0946292	0.110492	0.0955729
299	0.0884306	0.103642	0.0931674	0.101339	0.105653	0.102537	0.109404	0.104861	0.0912171
300	0.0859471	0.0917796	0.0960708	0.103934	0.121081	0.112619	0.104142	0.108102	0.0878008
301	0.0884914	0.0920794	0.0936583	0.101938	0.10295	0.106383	0.0982818	0.102146	0.0937303
302	0.0941278	0.0932395	0.0925032	0.0997357	0.117719	0.125344	0.0974852	0.0982226	0.0982753
303	0.0920478	0.100822	0.0958217	0.108726	0.1163	0.101941	0.0992683	0.10507	0.0972933
304	0.0951068	0.0953764	0.0899299	0.107346	0.115586	0.11709	0.11396	0.0965749	0.0883724
305	0.0891782	0.0997517	0.0924349	0.103389	0.102122	0.099172	0.107943	0.112277	0.0913514
306	0.0954944	0.0960727	0.0934145	0.0976558	0.105585	0.102548	0.0988161	0.0957541	0.0900044
307	0.0988937	0.0978067	0.0972614	0.104872	0.103142	0.123751	0.0949541	0.0994036	0.087546
308	0.100612	0.0956608	0.0929245	0.104966	0.104444	0.104811	0.0977678	0.0988938	0.0840561
309	0.0959332	0.0953395	0.0936509	0.111231	0.105163	0.0996266	0.101763	0.103008	0.0905774
310	0.0997738	0.100372	0.104596	0.106149	0.101039	0.107643	0.0896909	0.105228	0.0914552
311	0.0993673	0.0959337	0.0880882	0.110738	0.112431	0.112619	0.0973907	0.101105	0.0896249
312	0.0979868	0.0923299	0.0924977	0.102914	0.10254	0.104278	0.0932561	0.112531	0.0842849
313	0.090364	0.0904135	0.0920308	0.107721	0.107108	0.102293	0.094972	0.0970044	0.0893844
314	0.0951495	0.0910676	0.0938111	0.102243	0.0997105	0.107269	0.0957724	0.102371	0.0874574
315	0.0910113	0.0971869	0.0930477	0.100008	0.117892	0.102423	0.0954187	0.111861	0.0980387
316	0.098823	0.0971935	0.0907174	0.102918	0.100778	0.100618	0.0904909	0.105176	0.0849795
317	0.0902446	0.0995555	0.0910012	0.102492	0.11317	0.105836	0.0923401	0.101731	0.0903063
318	0.0927394	0.0946711	0.093464	0.097903	0.104269	0.0966363	0.0970373	0.107533	0.0893363
319	0.102126	0.10098	0.0905999	0.105621	0.111854	0.104424	0.111519	0.0992503	0.103562
320	0.0885152	0.0965899	0.0913955	0.104518	0.0980366	0.106904	0.0842689	0.105436	0.0879338
321	0.0921277	0.0955918	0.0921775	0.113244	0.100599	0.101785	0.089342	0.0997721	0.0872655
322	0.0910466	0.0996463	0.0960802	0.102711	0.102811	0.11148	0.112999	0.102773	0.0905619
323	0.0969678	0.0958662	0.0892944	0.0989479	0.10296	0.101259	0.0864871	0.0999623	0.0943148
324	0.0897239	0.0972933	0.0967043	0.106972	0.109347	0.112708	0.0970413	0.0934294	0.0893998
325	0.092079	0.0970252	0.0969498	0.0985666	0.0994959	0.119033	0.094449	0.104862	0.0895084
326	0.0898309	0.0971906	0.0985031	0.112385	0.108515	0.0994432	0.101528	0.111443	0.0921899
327	0.0926255	0.0967839	0.0929385	0.0988025	0.116603	0.105117	0.0943633	0.0978324	0.0910339
328	0.0917114	0.100991	0.0935881	0.100187	0.0997598	0.110594	0.0952343	0.105496	0.0874401
329	0.098541	0.0933518	0.0927291	0.104073	0.10186	0.107131	0.0931216	0.105439	0.0855066
330	0.0895574	0.100682	0.0918443	0.104191	0.109914	0.114652	0.100266	0.101675	0.095827
331	0.0983687	0.101909	0.0923788	0.101751	0.112924	0.0997486	0.104321	0.102661	0.0872758
332	0.0857208	0.0936297	0.0929701	0.100439	0.105677	0.101786	0.0903221	0.108621	0.0908846
333	0.0925865	0.09714	0.093381	0.0998147	0.125497	0.101007	0.0965861	0.102373	0.0855953
334	0.0906396	0.0964355	0.0929149	0.103175	0.10411	0.111457	0.100751	0.0981518	0.0971958
335	0.0952074	0.0946518	0.0928283	0.098344	0.105653	0.109833	0.0918869	0.103548	0.0923301
336	0.0885374	0.102889	0.0910842	0.098275	0.111985	0.111138	0.0923068	0.0939435	0.0867841
337	0.0898186	0.0952249	0.0928459	0.106151	0.102185	0.101427	0.0990252	0.107291	0.090988
338	0.0894698	0.0969332	0.0939953	0.0994749	0.103147	0.101453	0.10109	0.0995639	0.0894859
339	0.0913076	0.091966	0.0949736	0.0999752	0.105574	0.107191	0.0953484	0.0927434	0.0942058
340	0.090675	0.0951256	0.0937275	0.09667	0.112127	0.113948	0.0904559	0.105891	0.0857216
341	0.0848132	0.098756	0.0945962	0.0985832	0.099311	0.0996203	0.0906566	0.0990252	0.0921432
342	0.0894076	0.0921143	0.0959468	0.0972715	0.109144	0.111301	0.107826	0.094912	0.091125
343	0.0918418	0.0984536	0.0902005	0.101783	0.108818	0.111201	0.0891867	0.100044	0.0903284
344	0.0886827	0.0946913	0.095956	0.0975701	0.105181	0.10767	0.0884857	0.0958334	0.0923566
345	0.0910253	0.0935539	0.0940441	0.10156	0.102863	0.0961933	0.101813	0.0975547	0.0901177
346	0.0945106	0.0934186	0.101761	0.10053	0.119169	0.105895	0.107276	0.0954176	0.08681
347	0.0945773	0.0958526	0.0942653	0.107914	0.108499	0.100574	0.089937	0.101052	0.0954761
348	0.092142	0.0922952	0.0927371	0.0981277	0.0985134	0.10966	0.0865083	0.0998025	0.0893982
349	0.0872524	0.0947095	0.089651	0.100189	0.126671	0.101436	0.103419	0.0976223	0.0855796
350	0.0939648	0.0999915	0.0935335	0.105652	0.110006	0.0995313	0.0897283	0.100656	0.0851986
351	0.0982663	0.0954862	0.0968515	0.101653	0.103938	0.0999105	0.100987	0.0963245	0.0892359
352	0.0982968	0.0923088	0.0959509	0.0992772	0.115374	0.101353	0.102333	0.101488	0.0924451
353	0.0872306	0.0921039	0.0929131	0.101565	0.116205	0.100688	0.0903421	0.108877	0.0895912
354	0.0950499	0.0939263	0.0938787	0.0977815	0.109853	0.098786	0.0974671	0.102703	0.100082
355	0.100043	0.0945492	0.0915808	0.101538	0.106451	0.0956915	0.0905538	0.0971142	0.090758
356	0.0926625	0.0976387	0.0954655	0.101206	0.111163	0.105312	0.0973966	0.0951784	0.0878213
357	0.0914646	0.104376	0.0972723	0.111042	0.109224	0.0985235	0.101085	0.0987935	0.0879414
358	0.0926911	0.0956815	0.0919965	0.100989	0.111132	0.10335	0.0950161	0.100214	0.0883838
359	0.0935062	0.094999	0.0905229	0.09877	0.101322	0.107882	0.110348	0.10489	0.092145
360	0.093513	0.095004	0.0933619	0.100037	0.119641	0.100346	0.105388	0.0953155	0.0844098
361	0.0917882	0.0928303	0.0940389	0.101319	0.106592	0.0991491	0.101011	0.103214	0.0861985
362	0.0893774	0.0935532	0.0924762	0.101272	0.122144	0.0982109	0.111749	0.0937525	0.0909906
363	0.0961283	0.0947922	0.0937095	0.101187	0.107872	0.104246	0.10008	0.0972302	0.0914884
364	0.0935739	0.0911066	0.0936184	0.0998032	0.121196	0.0969353	0.0971873	0.102469	0.0909583
365	0.0897477	0.0927189	0.104732	0.0996911	0.106768	0.104526	0.0962429	0.0976617	0.0864311
366	0.0876967	0.0898849	0.0956001	0.104116	0.106493	0.0991885	0.0997089	0.0973027	0.0948502
367	0.0930458	0.0938287	0.0944127	0.0984316	0.111908	0.0994394	0.0965477	0.0994421	0.0841085
368	0.0943367	0.0968701	0.0930804	0.0981051	0.107396	0.104694	0.101762	0.104219	0.0862072
369	0.088866	0.0904407	0.090269	0.100678	0.106429	0.113971	0.101203	0.101114	0.0855314
370	0.0933707	0.0932397	0.0964928	0.0999626	0.127713	0.0978428	0.0929345	0.108234	0.085668
371	0.086578	0.0928584	0.0933432	0.101846	0.115742	0.099849	0.104424	0.0957204	0.0875852
372	0.0877483	0.0904118	0.0968348	0.103375	0.113309	0.0949001	0.0934629	0.0989708	0.0933807
373	0.0878531	0.0917049	0.0924263	0.100686	0.116832	0.0996371	0.0987402	0.0998094	0.090744
374	0.0886286	0.0949592	0.0923145	0.0972455	0.107376	0.111229	0.0923453	0.0983365	0.0924635
375	0.0857452	0.0912671	0.0964659	0.101161	0.113725	0.0957891	0.0950732	0.0965282	0.0924637
376	0.0881858	0.0984924	0.0957418	0.107258	0.115021	0.105151	0.103035	0.0951983	0.0851949
377	0.0886736	0.0931747	0.0909258	0.0976419	0.109556	0.100569	0.105346	0.0964537	0.0921821
378	0.0872927	0.0920827	0.0946434	0.0954053	0.103478	0.101813	0.0912737	0.0958989	0.084448
379	0.092144	0.0939597	0.09962	0.102968	0.119864	0.104574	0.0905576	0.101829	0.086613
380	0.0969432	0.0926144	0.0919723	0.0997966	0.102253	0.0991867	0.0923657	0.0964567	0.085154
381	0.090085	0.0967995	0.0964286	0.100722	0.108759	0.102123	0.0973154	0.0984873	0.096511
382	0.0902217	0.0900943	0.0942846	0.0965164	0.113751	0.105406	0.104122	0.0987409	0.0862052
383	0.0894317	0.088453	0.0923641	0.107559	0.120586	0.0985665	0.0942616	0.102738	0.0850342
384	0.0888339	0.0903059	0.0925011	0.106077	0.103468	0.0997854	0.0940415	0.0942658	0.0853229
385	0.0994185	0.0904189	0.0950129	0.099995	0.1139	0.102608	0.0932684	0.0973501	0.0860226
386	0.096705	0.0891103	0.0898386	0.0977378	0.109373	0.100348	0.0972475	0.100397	0.0860754
387	0.0874364	0.09117	0.0915756	0.10076	0.10458	0.100568	0.0944625	0.091663	0.0823007
388	0.0970329	0.107806	0.0927678	0.102403	0.114393	0.104169	0.095476	0.0972371	0.0895213
389	0.0947002	0.0927478	0.0892841	0.0985561	0.106996	0.104114	0.0992099	0.0933596	0.0921853
390	0.0986897	0.097379	0.093435	0.111404	0.108506	0.100777	0.102104	0.0950517	0.0890014
391	0.0886039	0.0913132	0.0925972	0.0976449	0.108565	0.0985267	0.100885	0.0941931	0.0915942
392	0.100166	0.0893833	0.0930789	0.0981719	0.108039	0.101626	0.0944415	0.0972641	0.0853733
393	0.0885449	0.0897533	0.0969893	0.106421	0.10224	0.0986811	0.100747	0.102417	0.0832781
394	0.0967527	0.0898649	0.0893428	0.101937	0.12693	0.0964637	0.104738	0.0958337	0.0843838
395	0.0923167	0.0923846	0.0962526	0.104108	0.107962	0.103076	0.104307	0.0986012	0.086399
396	0.0960808	0.0895192	0.0952435	0.105428	0.110644	0.101814	0.0954683	0.0932937	0.0916612
397	0.086927	0.0995758	0.0987992	0.102827	0.10927	0.106299	0.0941505	0.0915173	0.0861212
398	0.0974895	0.0964687	0.097046	0.100833	0.117134	0.106383	0.11081	0.104761	0.0857666
399	0.083653	0.0920618	0.0966436	0.098452	0.111743	0.106561	0.0983395	0.098775	0.0855425
400	0.0887817	0.0902292	0.0902918	0.103214	0.118263	0.0977203	0.0937556	0.095765	0.0925609
401	0.0916279	0.0960273	0.0938648	0.103042	0.105666	0.101355	0.105911	0.0943514	0.0833793
402	0.0937126	0.0901627	0.0959791	0.0961587	0.115285	0.100874	0.0945587	0.0938629	0.0894495
403	0.0910937	0.0909743	0.0955039	0.0979504	0.101525	0.110531	0.0972065	0.0906593	0.0844376
404	0.0917489	0.0899281	0.0947127	0.0997646	0.117638	0.0989756	0.0973786	0.0929147	0.0951561
405	0.0937813	0.0920998	0.0971178	0.0967151	0.113569	0.102526	0.0974574	0.0917192	0.0833831
406	0.0911381	0.0918316	0.0874735	0.0930699	0.107931	0.0986356	0.0923671	0.0977073	0.0878651
407	0.104502	0.0895964	0.0926502	0.0934249	0.106119	0.102117	0.0899098	0.0983551	0.090774
408	0.0877531	0.093883	0.0948613	0.0972703	0.133997	0.103168	0.106054	0.102902	0.0962044
409	0.0910977	0.0953771	0.0929841	0.0968031	0.114891	0.108777	0.09384	0.0941628	0.0956974
410	0.0940183	0.0921482	0.0923492	0.0986619	0.113179	0.10163	0.0958599	0.105202	0.0828966
411	0.0904383	0.0932021	0.0985784	0.103026	0.107388	0.0976958	0.093474	0.0980794	0.0846763
412	0.0947636	0.093718	0.0915809	0.103562	0.111084	0.0973202	0.0940415	0.0935359	0.0923851
413	0.0908363	0.0911695	0.0994422	0.102355	0.107818	0.103417	0.0909422	0.0922021	0.0861046
414	0.104491	0.0933879	0.0947912	0.106094	0.107072	0.102363	0.0942736	0.089515	0.0832625
415	0.085918	0.0968904	0.0929133	0.0986447	0.113757	0.0966222	0.109615	0.0924189	0.0876792
416	0.0939637	0.0913967	0.104521	0.101348	0.103259	0.0995684	0.0962816	0.0972822	0.0861655
417	0.0920985	0.0886856	0.0918161	0.0975943	0.116434	0.0981276	0.0951616	0.0930778	0.0867504
418	0.0981127	0.089276	0.0967665	0.0996898	0.108924	0.0989757	0.102092	0.0960381	0.0903195
419	0.0878722	0.090703	0.0883494	0.0994028	0.111655	0.103134	0.107859	0.0989571	0.0850463
420	0.08828	0.0921907	0.092873	0.097134	0.10642	0.0964531	0.094775	0.0941598	0.0857955
421	0.100175	0.0908297	0.0892139	0.0966018	0.121319	0.0990817	0.0916703	0.0914699	0.0851716
422	0.0857601	0.0923319	0.0940533	0.094156	0.10762	0.0958354	0.103479	0.0947911	0.0828973
423	0.091994	0.0923633	0.0893751	0.0979411	0.107364	0.103079	0.100691	0.0992729	0.0856255
424	0.0977842	0.0858062	0.0908138	0.0976573	0.125649	0.11277	0.102394	0.092103	0.086149
425	0.086978	0.100546	0.0938425	0.107083	0.110645	0.0949452	0.0963739	0.0917434	0.0848257
426	0.0877104	0.0926622	0.0952843	0.0954554	0.103181	0.101946	0.0948816	0.0951025	0.0879278
427	0.0896304	0.0897423	0.0918792	0.104015	0.106574	0.10002	0.0884647	0.0932135	0.0851589
428	0.0927511	0.0889599	0.0988125	0.110383	0.112037	0.0961715	0.0901692	0.0903788	0.0904806
429	0.102575	0.0914395	0.0947776	0.0999267	0.109932	0.097003	0.0920078	0.0960251	0.0907067
430	0.0928701	0.0942477	0.0940427	0.0991244	0.10196	0.0973815	0.0927012	0.0991827	0.0869321
431	0.0951401	0.0885218	0.094166	0.110204	0.111312	0.102542	0.0986878	0.0965007	0.0914208
432	0.0894979	0.0845132	0.0922605	0.095042	0.109828	0.098364	0.0997733	0.096895	0.0871559
433	0.0899124	0.0880355	0.0960366	0.0922411	0.113268	0.0964172	0.103102	0.098863	0.0859552
434	0.0979009	0.0909735	0.094662	0.102243	0.116969	0.10944	0.090852	0.091271	0.0868637
435	0.0966256	0.0916645	0.0957839	0.0965154	0.106634	0.0958873	0.0902526	0.0948414	0.0963141
436	0.0950397	0.0907848	0.0953188	0.100783	0.106043	0.0987102	0.0935378	0.0893486	0.0923862
437	0.0944053	0.090124	0.0903488	0.0996096	0.114892	0.0942732	0.0901145	0.0973726	0.0893882
438	0.103002	0.0956395	0.0919569	0.104796	0.112926	0.111546	0.12081	0.0976501	0.0978226
439	0.101891	0.086873	0.0890185	0.101661	0.105046	0.0931343	0.096445	0.0904893	0.0991248
440	0.0873148	0.0971788	0.0900315	0.0955487	0.101621	0.108396	0.0870794	0.096614	0.0930292
441	0.0904284	0.0962629	0.0889696	0.0930844	0.109204	0.0984641	0.0882297	0.0948613	0.0838119
442	0.0823943	0.0908552	0.0954998	0.106384	0.104841	0.0990691	0.0914245	0.0914787	0.0857872
443	0.0971948	0.0944373	0.0970185	0.100286	0.130162	0.0998261	0.0931415	0.101788	0.0886871
444	0.0936785	0.0920221	0.0924792	0.102631	0.115241	0.0942566	0.0932086	0.0964067	0.0820801
445	0.102727	0.0897371	0.0909733	0.101901	0.106594	0.0974014	0.0907523	0.096235	0.0835523
446	0.0877763	0.0909216	0.0911481	0.0986437	0.109828	0.0978427	0.101092	0.101755	0.0860116
447	0.09018	0.0940589	0.089397	0.0983169	0.125003	0.102838	0.11482	0.0887204	0.0930635
448	0.0889423	0.0917074	0.0910798	0.0981091	0.113665	0.10757	0.103499	0.0897529	0.0920226
449	0.0920533	0.0900243	0.0882308	0.0965747	0.117866	0.108937	0.0874555	0.0947328	0.0831381
450	0.0886245	0.0895768	0.0929878	0.113455	0.107154	0.0989953	0.0908349	0.0898721	0.0882523
451	0.0875999	0.0904252	0.087237	0.100018	0.118442	0.101387	0.0880977	0.0970139	0.0852495
452	0.104183	0.0860337	0.0974638	0.106302	0.114062	0.0906499	0.0903141	0.0902511	0.0866872
453	0.0876833	0.0885771	0.0904018	0.103679	0.109474	0.094837	0.0902244	0.0944226	0.0900896
454	0.0889644	0.0946173	0.0941125	0.0964121	0.103507	0.0984331	0.100416	0.0914327	0.0852341
455	0.0919595	0.0924444	0.0890349	0.0945092	0.113514	0.0975267	0.0849075	0.0893105	0.085114
456	0.0918769	0.0924784	0.0894782	0.11587	0.117828	0.0974288	0.0904434	0.0893369	0.086949
457	0.0886291	0.0917854	0.0946134	0.0952388	0.114277	0.118904	0.0908021	0.0907418	0.0894482
458	0.0893007	0.0902605	0.0943029	0.102626	0.0997765	0.0919213	0.0885843	0.0901247	0.0831255
459	0.0887232	0.0929368	0.0897899	0.0998356	0.116232	0.103859	0.0911643	0.0881433	0.0857896
460	0.0918654	0.0907507	0.0892152	0.0942856	0.110312	0.0958593	0.0918814	0.088402	0.0868863
461	0.0946626	0.101956	0.0960722	0.0984376	0.108716	0.105759	0.0881637	0.0902198	0.0849689
462	0.094544	0.0927429	0.0926046	0.0992466	0.106245	0.0978535	0.0877036	0.102959	0.0866311
463	0.0973608	0.0948068	0.0897645	0.0939738	0.111534	0.103001	0.0932329	0.0891397	0.0912169
464	0.085968	0.0936829	0.0916077	0.102899	0.102379	0.115638	0.0907019	0.093743	0.0934091
465	0.08797	0.0909134	0.090771	0.0986542	0.11793	0.0964737	0.107362	0.0882406	0.0896922
466	0.0854357	0.0970955	0.0894805	0.100843	0.103099	0.110012	0.091481	0.0889117	0.0902078
467	0.0902455	0.0929806	0.0974116	0.100904	0.107906	0.0922773	0.0932657	0.0925465	0.0886405
468	0.0864427	0.0905336	0.0895211	0.0946565	0.110002	0.102108	0.0914199	0.0934479	0.0857466
469	0.0884809	0.0927048	0.0914338	0.102057	0.10148	0.100807	0.0943501	0.0903958	0.0879555
470	0.0888849	0.0914899	0.0904048	0.0997411	0.10661	0.101899	0.0938485	0.0959117	0.0878444
471	0.0853086	0.0946943	0.0891397	0.0965059	0.106509	0.121741	0.093479	0.105027	0.08619
472	0.092569	0.0937391	0.0935323	0.0957613	0.101579	0.101198	0.107646	0.0869833	0.0884924
473	0.0908393	0.096705	0.090462	0.0974676	0.103048	0.100092	0.0877602	0.0928643	0.0859712
474	0.0931003	0.0900021	0.0927565	0.0988582	0.105241	0.0957766	0.0910364	0.0897158	0.0805067
475	0.0930788	0.0884567	0.0916822	0.116421	0.113295	0.0940561	0.0919881	0.0921365	0.0881091
476	0.0904018	0.0905489	0.0929006	0.106868	0.121476	0.0984809	0.0885378	0.0885729	0.0860597
477	0.0896015	0.0868211	0.0907984	0.107186	0.11928	0.0961751	0.0931085	0.0879197	0.0848043
478	0.0901079	0.0952551	0.0923713	0.108602	0.11078	0.0968307	0.0880946	0.0921116	0.0893423
479	0.0851753	0.0892005	0.0876162	0.0972429	0.111665	0.10247	0.0960983	0.0876031	0.0911275
480	0.0871239	0.0896366	0.0941156	0.0982864	0.105049	0.0937924	0.0957982	0.0976144	0.0893043
481	0.0900263	0.0939229	0.0958504	0.107335	0.125854	0.0952079	0.0963449	0.0869519	0.0834206
482	0.0938875	0.0890693	0.0959575	0.0991226	0.107275	0.0984444	0.0896921	0.091535	0.0996247
483	0.0838083	0.0945964	0.0926673	0.0990297	0.111091	0.0948942	0.0940003	0.086867	0.0900122
484	0.0902068	0.101171	0.0894968	0.0984892	0.105877	0.0961012	0.0907065	0.0863852	0.0881582
485	0.0946327	0.0923958	0.0976281	0.114012	0.138591	0.0966255	0.0899373	0.0875223	0.0857747
486	0.0921437	0.0936863	0.0897918	0.106836	0.107151	0.0969328	0.0931777	0.0895577	0.0856206
487	0.107462	0.0937317	0.102279	0.107373	0.100757	0.099317	0.0878383	0.0931915	0.0887334
488	0.0889249	0.0914893	0.0929289	0.0940913	0.107583	0.0984898	0.0932011	0.0954356	0.0876896
489	0.0904035	0.0886087	0.0944113	0.0987116	0.13673	0.095507	0.0912696	0.0905756	0.0871537
490	0.0908305	0.0944459	0.0977801	0.0990219	0.107895	0.102424	0.110917	0.0916928	0.0888411
491	0.0888624	0.093153	0.0916742	0.111567	0.112917	0.0925886	0.0898719	0.0930014	0.0889246
492	0.0936871	0.0929121	0.0902346	0.0921182	0.0982245	0.0937942	0.0837183	0.097368	0.0859487
493	0.0857543	0.0949244	0.102328	0.1041	0.112417	0.0994847	0.0881554	0.0895132	0.0868101
494	0.092168	0.0945803	0.0927575	0.11756	0.113843	0.106554	0.0952331	0.0995624	0.0887867
495	0.0880447	0.090449	0.0912442	0.101099	0.0969786	0.100672	0.08874	0.0872617	0.0844874
496	0.0923869	0.092046	0.0931438	0.0984762	0.129293	0.0914606	0.0894843	0.0928817	0.0836808
497	0.0928993	0.0874819	0.0908337	0.106567	0.125502	0.0967275	0.0909253	0.0938915	0.0874428
498	0.0895237	0.0982714	0.0956188	0.104288	0.109488	0.101403	0.0861912	0.0938396	0.0875065
499	0.0871406	0.0910235	0.103865	0.103267	0.130266	0.110814	0.0881815	0.0873509	0.0842801
500	0.0993491	0.0912401	0.0912848	0.100485	0.103249	0.0945076	0.0914805	0.0927702	0.0896333
501	0.0846966	0.0925004	0.0936806	0.0968623	0.108531	0.0939157	0.109146	0.0918065	0.086633
502	0.0879284	0.0917258	0.0945279	0.0968515	0.102376	0.0947843	0.0878178	0.0902839	0.0845022
503	0.091074	0.0879456	0.0960705	0.112083	0.105589	0.0959642	0.090396	0.0948866	0.0901288
504	0.100097	0.0908511	0.105128	0.0988585	0.104207	0.0916975	0.0875042	0.0909219	0.087167
505	0.0878047	0.105738	0.0929125	0.101353	0.0976409	0.0908496	0.0896619	0.0917457	0.0840843
506	0.0891748	0.089182	0.0901572	0.0992022	0.111385	0.0970882	0.0886843	0.0884306	0.0852657
507	0.0876351	0.090267	0.0926962	0.101211	0.107422	0.0927006	0.0950498	0.0912274	0.0862355
508	0.0894885	0.0943672	0.099002	0.104209	0.120246	0.109117	0.103103	0.0886712	0.0904647
509	0.0923407	0.0970194	0.092114	0.102296	0.0978337	0.0984399	0.088912	0.0900407	0.0861717
510	0.0847415	0.0904886	0.0903091	0.0941651	0.105898	0.09306	0.0929418	0.0908154	0.0939209
511	0.0866039	0.0867842	0.091208	0.109547	0.10088	0.102881	0.112322	0.0849166	0.0835895
512	0.0861972	0.0876551	0.097601	0.102089	0.126068	0.106462	0.0856152	0.0944496	0.0858226
513	0.0901875	0.0938398	0.0924897	0.0972367	0.102129	0.103704	0.0943305	0.0901151	0.0871271
514	0.0943079	0.0913368	0.0881452	0.108798	0.107297	0.100282	0.0846214	0.0867466	0.0840458
515	0.0831799	0.0868784	0.0946823	0.104648	0.106562	0.090693	0.094127	0.0909654	0.0984342
516	0.0881332	0.095172	0.0938784	0.0931291	0.101388	0.0916703	0.089829	0.0888869	0.0874604
517	0.086459	0.0880079	0.0897924	0.101556	0.10175	0.100528	0.0856822	0.0962712	0.089153
518	0.0837431	0.0956335	0.0955853	0.100924	0.121676	0.0939991	0.0933506	0.0905866	0.0882295
519	0.092144	0.0931629	0.0996352	0.0947439	0.0991797	0.0975887	0.099793	0.0911167	0.0894398
520	0.0913105	0.0896348	0.0953336	0.101901	0.106264	0.0941227	0.0936258	0.0873919	0.0878531
521	0.0892668	0.101795	0.0919528	0.092523	0.111965	0.0977816	0.0958329	0.0871299	0.0847571
522	0.0919113	0.0920125	0.0898302	0.0920182	0.112058	0.095098	0.0959792	0.0934992	0.0909624
523	0.0862534	0.0932463	0.0963195	0.0982074	0.10309	0.096336	0.0900249	0.088376	0.0890831
524	0.0964098	0.0963387	0.0949992	0.0964008	0.114324	0.09699	0.0906432	0.0892487	0.0878195
525	0.0910413	0.0908125	0.0977596	0.0987903	0.104351	0.10281	0.0883126	0.0892499	0.0923571
526	0.0869534	0.090883	0.0975915	0.0990791	0.129119	0.101337	0.0864057	0.0926019	0.0934952
527	0.0850753	0.0903622	0.0902622	0.0961805	0.114749	0.094249	0.0881892	0.0885873	0.0900124
528	0.0853821	0.0874942	0.0884446	0.104798	0.106332	0.0967372	0.0986879	0.0867994	0.0873107
529	0.0868245	0.0913331	0.0922179	0.0956429	0.108798	0.0987363	0.0897909	0.0855692	0.0881099
530	0.0829654	0.0886771	0.0954775	0.0954621	0.108178	0.109355	0.0924554	0.0905183	0.0860956
531	0.0896455	0.092647	0.0885541	0.108764	0.102347	0.093489	0.102997	0.0873899	0.0841161
532	0.0890757	0.0920029	0.0960612	0.101455	0.118599	0.101263	0.107442	0.0880213	0.0848206
533	0.0884205	0.0990344	0.0944535	0.105096	0.101457	0.113889	0.0953846	0.0887549	0.091332
534	0.0887412	0.0907124	0.0960844	0.102971	0.109133	0.0959894	0.0927502	0.0912333	0.0905477
535	0.0880517	0.0902078	0.0962142	0.110612	0.109316	0.0922706	0.0889643	0.0936661	0.0882615
536	0.0883758	0.0894808	0.101124	0.100612	0.101556	0.0938693	0.0941018	0.0893663	0.0865284
537	0.0909999	0.0872385	0.0938031	0.10276	0.102181	0.0931018	0.0897705	0.0864812	0.0871045
538	0.0886456	0.0946744	0.0920787	0.105711	0.118542	0.0911779	0.0881902	0.0892001	0.089902
539	0.0916938	0.0863519	0.0928315	0.0990947	0.102287	0.106319	0.0949648	0.0908343	0.0832791
540	0.106513	0.0897209	0.092045	0.0966369	0.0962858	0.0932494	0.0990852	0.0993529	0.0847313
541	0.0997655	0.0892922	0.0983034	0.102521	0.10978	0.0937162	0.0992286	0.0920198	0.0893726
542	0.087516	0.0911688	0.103009	0.0957827	0.104114	0.101138	0.0965507	0.0915789	0.0943012
543	0.083071	0.0896862	0.100152	0.0922898	0.100392	0.0967329	0.0896237	0.0875928	0.0841983
544	0.0836637	0.0940673	0.0942316	0.0977084	0.100897	0.103803	0.0875562	0.0868786	0.0844492
545	0.0846172	0.0876768	0.0910655	0.10274	0.108103	0.107008	0.0858421	0.0928049	0.0853809
546	0.0893746	0.0928854	0.0964502	0.0962686	0.110111	0.0966551	0.108951	0.0974597	0.0860195
547	0.084268	0.0883915	0.104148	0.0991199	0.102053	0.0914913	0.0869205	0.0860757	0.0897907
548	0.0871601	0.0925572	0.0955729	0.0888441	0.102583	0.0935183	0.0898153	0.087644	0.0905192
549	0.0869878	0.0932844	0.0992507	0.102896	0.102493	0.0956334	0.102697	0.0887853	0.089429
550	0.0900195	0.0936515	0.105123	0.0952252	0.101907	0.0926793	0.10219	0.091143	0.0880555
551	0.0893956	0.0893736	0.101406	0.0959937	0.0991863	0.0937437	0.0873518	0.0885915	0.084807
552	0.0874487	0.0903641	0.0970633	0.0904649	0.112133	0.0955206	0.0933291	0.0916162	0.0896412
553	0.0842768	0.090685	0.0938342	0.0985278	0.10218	0.0926952	0.085147	0.0909258	0.0870546
554	0.0929443	0.0894612	0.0944118	0.0909899	0.103918	0.116282	0.089452	0.0866149	0.0936378
555	0.0893279	0.0901338	0.094566	0.0880321	0.103331	0.0994974	0.0895462	0.0890767	0.0897431
556	0.0858469	0.0891841	0.0968698	0.103168	0.0981782	0.101046	0.0872139	0.0921448	0.0884239
557	0.0926401	0.0918584	0.0942161	0.103845	0.117334	0.0938573	0.0951495	0.0880889	0.0876644
558	0.0825206	0.0897423	0.097637	0.0936837	0.0970931	0.0958364	0.0928	0.0911485	0.0946349
559	0.0893938	0.0974659	0.0953709	0.10213	0.109971	0.0930179	0.08821	0.0897128	0.0894166
560	0.0926425	0.093842	0.0949937	0.103693	0.102676	0.0987114	0.103083	0.0901083	0.0845956
561	0.0853755	0.0914916	0.0879782	0.0949258	0.106966	0.0916851	0.0900194	0.0842036	0.0890199
562	0.0947542	0.090036	0.0947238	0.0948157	0.103332	0.093244	0.0931043	0.0861603	0.088569
563	0.0982131	0.0978887	0.0939406	0.100426	0.0984282	0.102575	0.0959849	0.0871741	0.0919104
564	0.0877814	0.0914897	0.0887621	0.0935787	0.096778	0.0959215	0.0893709	0.0923473	0.0878327
565	0.107508	0.0940177	0.0903975	0.0957823	0.0980698	0.0913062	0.0901477	0.089964	0.0880702
566	0.100339	0.0936048	0.0933728	0.0969533	0.125795	0.09101	0.0990851	0.0873188	0.0860112
567	0.0905274	0.0918171	0.0987597	0.0921242	0.127022	0.0972736	0.0890006	0.0994952	0.0905944
568	0.0892971	0.0976585	0.0916161	0.0930322	0.121413	0.0962886	0.0870794	0.0924414	0.0861482
569	0.0913962	0.095881	0.0963437	0.0919688	0.104489	0.0938581	0.0869126	0.0910026	0.0825802
570	0.0859653	0.0879147	0.0941777	0.104035	0.0946852	0.0907445	0.0861205	0.0868017	0.0852078
571	0.083748	0.089977	0.10665	0.104318	0.113731	0.0959743	0.096157	0.106481	0.0834657
572	0.0832059	0.0982057	0.0998621	0.117076	0.107278	0.0888055	0.0914221	0.0869418	0.0826682
573	0.0868563	0.0902662	0.0909023	0.0918717	0.103055	0.093044	0.0843836	0.0865677	0.0836471
574	0.0982504	0.0844122	0.0962408	0.120248	0.104743	0.0954162	0.0952071	0.0818914	0.093797
575	0.0882804	0.0891602	0.101933	0.0956697	0.102137	0.0946126	0.111986	0.09888	0.083199
576	0.0886437	0.0932505	0.0866241	0.0937182	0.101451	0.093352	0.0872057	0.0867355	0.088795
577	0.0899741	0.0999661	0.103518	0.0935857	0.118221	0.0955265	0.10192	0.0878145	0.0862479
578	0.0874939	0.0900926	0.0908885	0.09116	0.0980725	0.112222	0.087687	0.0844525	0.0843502
579	0.0820644	0.0968321	0.0999571	0.0993949	0.114114	0.0920356	0.0974224	0.0891038	0.0838701
580	0.0934878	0.088321	0.095261	0.102127	0.113808	0.0992995	0.0839337	0.0881246	0.0876403
581	0.0876558	0.0891785	0.102624	0.094651	0.104263	0.0932069	0.0907842	0.0828034	0.0852499
582	0.0894077	0.0918645	0.0936389	0.101239	0.107997	0.105136	0.0879694	0.0830447	0.100601
583	0.0923471	0.0952895	0.103123	0.0895498	0.0970298	0.103122	0.0825405	0.0964246	0.0834293
584	0.0864362	0.0990869	0.100722	0.0973025	0.113636	0.0898251	0.0901103	0.0911912	0.0873758
585	0.0861589	0.10454	0.0949771	0.0960864	0.0979547	0.0935881	0.0928355	0.0867002	0.0844302
586	0.092337	0.0899051	0.102004	0.0900322	0.111441	0.0902737	0.0956603	0.0924085	0.0863572
587	0.0848244	0.0878202	0.106263	0.094287	0.0967835	0.0886754	0.0926353	0.0881483	0.0933102
588	0.0849203	0.0931902	0.0962401	0.0901905	0.107477	0.0998588	0.0941377	0.0958388	0.0924736
589	0.0876555	0.0944816	0.107881	0.118024	0.115575	0.0923963	0.0819813	0.0849059	0.0831235
590	0.0845846	0.0901707	0.0956988	0.0892481	0.097989	0.0921535	0.0839607	0.090702	0.0877551
591	0.0877223	0.0867715	0.102143	0.0993119	0.0998617	0.090289	0.0828	0.0856378	0.0914822
592	0.0857335	0.0924945	0.0915382	0.0967931	0.101204	0.0914671	0.091606	0.086654	0.0809251
593	0.0908957	0.0903518	0.0882497	0.091973	0.112072	0.0948468	0.0870278	0.0987108	0.087081
594	0.081146	0.0868209	0.0919614	0.0996453	0.0997042	0.0997856	0.0856554	0.0884708	0.0870801
595	0.0897359	0.0922092	0.0922209	0.0938523	0.110908	0.0922538	0.102054	0.0854374	0.0841327
596	0.09112	0.0890335	0.0920476	0.0933888	0.104094	0.0886508	0.0884793	0.0855172	0.0856023
597	0.0894739	0.0883802	0.0880757	0.0915944	0.105683	0.0933368	0.0858345	0.0846039	0.0875691
598	0.0995888	0.0898677	0.0956659	0.108043	0.112957	0.0931525	0.088762	0.0885529	0.0892195
599	0.0871539	0.0900954	0.0908049	0.0916716	0.10573	0.0938422	0.0983766	0.0820572	0.0884132
600	0.0933235	0.0894791	0.0963232	0.0903047	0.117736	0.0928887	0.0861568	0.0904708	0.0881059

## Sheet: FaceAgePrediction_BS100
	EI_RMSE_BS100_Exp1	EI_RMSE_BS100_Exp2	EI_RMSE_BS100_Exp3	MaxVar_RMSE_BS100_Exp1	MaxVar_RMSE_BS100_Exp2	MaxVar_RMSE_BS100_Exp3	Rand_RMSE_BS100_Exp1	Rand_RMSE_BS100_Exp2	Rand_RMSE_BS100_Exp3
0	17.6313	16.9795	17.6947	17.0785	16.9052	15.9678	16.8636	17.1846	17.7679
1	16.6931	15.033	15.0923	16.3	16.4433	15.4886	16.6705	15.5175	15.2376
2	14.4926	14.5522	14.9812	15.0159	14.5891	16.2371	14.8041	15.592	14.8416
3	14.8412	16.2215	13.8655	15.4055	14.6613	14.9532	15.2131	14.5981	14.7458
4	14.1066	14.6719	14.3926	14.3335	14.2832	14.5336	14.0152	14.815	14.5684
5	15.6339	14.9752	14.3716	14.0228	15.5259	14.4068	14.3954	14.9628	14.3092
6	13.5615	12.8307	13.2302	14.2047	14.3138	14.0678	13.1875	14.0743	14.1272
7	12.9453	12.7197	13.3584	13.8953	13.5572	14.1487	14.3788	13.4207	12.9712
8	13.0957	13.462	12.4228	14.0266	13.7903	13.8111	13.2599	13.6447	13.8583
9	12.7593	12.5234	12.8195	13.2795	13.3031	14.371	14.0138	13.1941	13.301
10	12.4127	12.4622	12.682	13.7247	13.4608	14.561	13.0229	12.8144	12.5179
11	13.0632	12.8678	11.9218	13.4193	13.704	13.4343	12.5573	13.1682	13.0198
12	12.0037	12.0064	12.1789	13.5553	13.2352	13.2728	12.894	12.4936	13.0091
13	12.053	12.3459	12.0844	12.9934	13.4814	12.8909	12.3461	12.5439	13.3309
14	13.0742	11.9517	11.7761	13.7515	13.276	13.1299	12.1433	11.9954	12.691
15	12.3325	12.2993	12.562	13.3586	12.5401	13.6807	12.2373	11.947	12.5386
16	12.3702	13.0797	11.4974	12.0148	12.8697	12.7305	11.6073	12.0966	12.4568
17	12.3234	12.9068	11.699	12.9744	12.6518	12.6732	12.2983	11.7283	12.5406
18	11.553	11.925	11.5258	13.4369	12.507	12.0483	12.1347	12.1304	13.457
19	12.0669	12.5196	11.6444	13.9378	14.2427	13.3805	11.785	13.0558	13.3291
20	11.392	12.3089	12.1378	12.945	12.1336	13.7289	11.6632	11.4272	11.9657

## Sheet: FaceAgePredictionBS200
	EI_RMSE_BS200_Exp1	EI_RMSE_BS200_Exp2	EI_RMSE_BS200_Exp3	MaxVar_RMSE_BS200_Exp1	MaxVar_RMSE_BS200_Exp2	MaxVar_RMSE_BS200_Exp3	Rand_RMSE_BS200_Exp1	Rand_RMSE_BS200_Exp2	Rand_RMSE_BS200_Exp3
0	16.8096	16.9299	16.7268	17.4197	18.8584	17.1176	16.8636	17.1846	17.7679
1	14.1329	15.2978	15.5246	14.9717	14.7187	14.9311	14.8041	15.592	14.8416
2	13.4597	14.5873	14.1213	13.8009	14.6287	14.8861	14.0152	14.815	14.5684
3	13.1653	13.7058	13.9704	13.6004	13.5421	13.3373	13.1875	14.0743	14.1272
4	12.991	13.0064	12.927	14.0958	13.6463	13.6989	13.2599	13.6447	13.8583
5	12.4968	12.8746	12.493	14.3871	13.0121	13.2881	13.0229	12.8144	12.5179
6	12.1922	12.7595	12.0229	12.5172	13.7065	13.2577	12.894	12.4936	13.0091
7	11.984	12.0523	12.0637	12.7801	12.9016	13.0201	12.1433	11.9954	12.691
8	12.0116	11.6598	12.1833	13.0059	12.6293	14.2794	11.6073	12.0966	12.4568
9	12.0377	11.7442	11.9484	12.0702	12.5144	12.808	12.1347	12.1304	13.457
10	12.1342	11.5927	12.6397	13.3186	12.6947	12.5062	11.6632	11.4272	11.9657

## Sheet: MNISTBinaryBS1
	EI_BS1_Acc_Exp1	EI_BS1_Acc_Exp2	EI_BS1_Acc_Exp3	MaxEnt_BS1_Acc_Exp1	MaxEnt_BS1_Acc_Exp2	MaxEnt_BS1_Acc_Exp3	Rand_BS1_Acc_Exp1	Rand_BS1_Acc_Exp2	Rand_BS1_Acc_Exp3	BALD_BS1_Acc_Exp1	BALD_BS1_Acc_Exp2	BALD_BS1_Acc_Exp3	Coreset_BS1_Acc_Exp1	Coreset_BS1_Acc_Exp2	Coreset_BS1_Acc_Exp3
0	0.843888	0.868925	0.770741	0.821797	0.843888	0.810015	0.855179	0.854688	0.865488	0.862543	0.788414	0.863034	0.831615	0.843397	0.819833
1	0.844379	0.798724	0.839961	0.851743	0.80756	0.899362	0.896416	0.883162	0.880707	0.901816	0.848306	0.790378	0.838979	0.873834	0.808542
2	0.894453	0.845852	0.844379	0.890525	0.878252	0.901816	0.874816	0.881198	0.855179	0.879234	0.853706	0.825724	0.858616	0.907707	0.888562
3	0.835542	0.920962	0.867943	0.820815	0.83947	0.875798	0.841924	0.815906	0.809524	0.874325	0.899362	0.79136	0.889053	0.853706	0.867452
4	0.899853	0.849288	0.827688	0.833579	0.874816	0.920962	0.854688	0.85567	0.818851	0.883652	0.859597	0.893962	0.865488	0.866961	0.869416
5	0.865979	0.916053	0.893471	0.867452	0.863034	0.88218	0.87727	0.874816	0.838979	0.921453	0.891998	0.936672	0.866961	0.895434	0.78596
6	0.891507	0.888071	0.895925	0.893962	0.89298	0.890034	0.893962	0.881198	0.886107	0.881198	0.919489	0.922926	0.841924	0.893962	0.863525
7	0.927344	0.905253	0.916544	0.899853	0.91458	0.915562	0.911635	0.920962	0.827197	0.934217	0.88758	0.91458	0.894944	0.917035	0.84487
8	0.865979	0.90918	0.897398	0.926362	0.862543	0.923908	0.915071	0.917526	0.883162	0.911144	0.819833	0.868434	0.908198	0.891016	0.87727
9	0.918508	0.918999	0.918999	0.900344	0.89838	0.893471	0.888562	0.915071	0.872852	0.881198	0.890525	0.94109	0.897889	0.918017	0.873343
10	0.934217	0.846343	0.955817	0.885616	0.899362	0.933726	0.869416	0.877761	0.908689	0.925871	0.931762	0.939126	0.918017	0.918508	0.873343
11	0.953363	0.883162	0.943054	0.901325	0.857143	0.937653	0.877761	0.901325	0.916544	0.909671	0.938635	0.939126	0.93569	0.926362	0.919489
12	0.945999	0.90918	0.961708	0.92538	0.912617	0.933235	0.878252	0.918999	0.923417	0.950908	0.868434	0.939126	0.912126	0.914089	0.91458
13	0.940599	0.903289	0.949926	0.962199	0.886107	0.916544	0.890034	0.913598	0.879725	0.940108	0.944035	0.933235	0.865488	0.941581	0.910653
14	0.944035	0.902307	0.952381	0.856652	0.944526	0.95729	0.94649	0.91458	0.936672	0.900835	0.929308	0.94109	0.88218	0.936672	0.94109
15	0.935199	0.940108	0.958763	0.93569	0.936181	0.950908	0.934217	0.840943	0.899362	0.875798	0.94109	0.955817	0.939126	0.938144	0.938144
16	0.967108	0.908689	0.958272	0.92489	0.948945	0.948454	0.93569	0.913598	0.932744	0.94649	0.934708	0.930781	0.901325	0.947963	0.932253
17	0.927835	0.941581	0.944526	0.939126	0.946981	0.952872	0.936181	0.947472	0.934708	0.922435	0.927835	0.939126	0.926853	0.932253	0.930781
18	0.966618	0.926853	0.945999	0.929308	0.946981	0.963181	0.945017	0.913598	0.931271	0.928817	0.900835	0.940108	0.918017	0.95189	0.941581
19	0.934708	0.947472	0.949435	0.923908	0.93569	0.950417	0.932744	0.923908	0.937653	0.925871	0.955326	0.941581	0.92538	0.958272	0.932253
20	0.958763	0.949435	0.953363	0.932744	0.944526	0.959254	0.94109	0.931271	0.905253	0.902307	0.913598	0.942563	0.945508	0.926362	0.938144
21	0.965636	0.956799	0.945508	0.948945	0.936672	0.96809	0.956308	0.911635	0.926362	0.939617	0.950417	0.950417	0.929308	0.929308	0.921944
22	0.938635	0.961708	0.957781	0.932253	0.95729	0.952381	0.936181	0.902798	0.936181	0.943054	0.963181	0.942563	0.943054	0.957781	0.913108
23	0.958272	0.957781	0.956308	0.928817	0.934217	0.940108	0.959254	0.906726	0.945999	0.956799	0.966127	0.953854	0.922926	0.950417	0.936672
24	0.953363	0.970054	0.969072	0.952872	0.956308	0.953854	0.942072	0.916053	0.935199	0.92489	0.959254	0.944526	0.945508	0.969563	0.94649
25	0.956308	0.959745	0.953363	0.941581	0.950417	0.96809	0.947963	0.911144	0.924399	0.960236	0.962199	0.958763	0.911635	0.970054	0.943544
26	0.970545	0.958272	0.961217	0.929308	0.954345	0.963672	0.952381	0.911635	0.942072	0.947472	0.969563	0.950908	0.949435	0.964163	0.912126
27	0.967599	0.975945	0.973981	0.92489	0.95729	0.954345	0.956308	0.930781	0.907216	0.91458	0.965145	0.954345	0.959254	0.952381	0.935199
28	0.966127	0.95729	0.971036	0.958763	0.95729	0.955817	0.952872	0.942563	0.918508	0.954836	0.955326	0.941581	0.955817	0.939126	0.931271
29	0.966618	0.96269	0.952381	0.931271	0.944526	0.955326	0.943544	0.91458	0.929308	0.910162	0.945017	0.937653	0.937653	0.950908	0.927344
30	0.967108	0.959745	0.975454	0.944035	0.953363	0.968581	0.949926	0.915562	0.897398	0.92489	0.962199	0.972018	0.95729	0.963181	0.958763
31	0.968581	0.971527	0.962199	0.964163	0.939617	0.979381	0.932253	0.935199	0.89838	0.947963	0.966127	0.937653	0.93029	0.952381	0.939617
32	0.971036	0.972018	0.954836	0.954345	0.967108	0.968581	0.947472	0.931271	0.940108	0.95189	0.96809	0.933235	0.95189	0.952872	0.900344
33	0.959745	0.970545	0.967108	0.953854	0.945508	0.977418	0.94649	0.93029	0.94649	0.960236	0.963672	0.969563	0.941581	0.963181	0.920471
34	0.961217	0.966127	0.972018	0.964654	0.956308	0.976436	0.953854	0.933235	0.938144	0.95729	0.953854	0.951399	0.956799	0.966127	0.928817
35	0.976927	0.963672	0.958763	0.955326	0.947963	0.970054	0.960236	0.912126	0.932253	0.947963	0.960236	0.948945	0.956308	0.950417	0.961708
36	0.966127	0.963672	0.970054	0.966127	0.943054	0.976436	0.943054	0.945999	0.951399	0.97349	0.969072	0.960727	0.963672	0.958272	0.956308
37	0.969072	0.953854	0.968581	0.955817	0.955326	0.972509	0.953363	0.917526	0.928326	0.961217	0.959254	0.965636	0.960727	0.961708	0.948945
38	0.975454	0.974472	0.970545	0.945508	0.953363	0.957781	0.940108	0.942563	0.914089	0.940108	0.931271	0.970545	0.950908	0.963672	0.945508
39	0.975945	0.974963	0.964163	0.975945	0.964163	0.97349	0.941581	0.914089	0.926362	0.970054	0.977418	0.969072	0.965145	0.964163	0.957781
40	0.950417	0.964163	0.970054	0.968581	0.961708	0.976927	0.954836	0.933235	0.927835	0.955326	0.961217	0.977909	0.963181	0.96269	0.956308
41	0.9784	0.975945	0.978891	0.978891	0.955326	0.955326	0.956799	0.935199	0.934217	0.954836	0.960236	0.96269	0.965636	0.974472	0.941581
42	0.975454	0.961708	0.980363	0.967599	0.946981	0.948945	0.950908	0.923417	0.950908	0.966618	0.964163	0.945999	0.950417	0.967599	0.961708
43	0.972018	0.970545	0.974472	0.935199	0.965636	0.960236	0.92489	0.926853	0.92538	0.939617	0.964654	0.958272	0.96809	0.965636	0.969072
44	0.975454	0.970545	0.969563	0.949926	0.952381	0.971527	0.960236	0.942563	0.937162	0.956308	0.960236	0.967108	0.955326	0.965145	0.95189
45	0.973981	0.973981	0.965636	0.961708	0.968581	0.974472	0.942563	0.949926	0.931762	0.956308	0.969072	0.967108	0.965636	0.970545	0.955817
46	0.975945	0.974472	0.96809	0.968581	0.953363	0.958763	0.949926	0.931271	0.951399	0.963672	0.964654	0.950908	0.973981	0.945508	0.965145
47	0.981836	0.9784	0.957781	0.958763	0.964163	0.969563	0.95729	0.927344	0.954836	0.943054	0.943054	0.954345	0.947963	0.965636	0.948945
48	0.975945	0.980363	0.970545	0.971036	0.948454	0.976436	0.969563	0.944035	0.948945	0.945999	0.949926	0.963181	0.970054	0.967108	0.965636
49	0.979381	0.968581	0.965145	0.974963	0.966127	0.9784	0.954345	0.91998	0.959254	0.970545	0.967599	0.955817	0.969563	0.960727	0.954345
50	0.968581	0.975454	0.963181	0.96809	0.962199	0.961708	0.960727	0.946981	0.938144	0.963181	0.952872	0.956308	0.9784	0.966618	0.952381
51	0.977418	0.962199	0.958272	0.968581	0.950908	0.974472	0.954345	0.929308	0.957781	0.960727	0.972018	0.971527	0.965636	0.96269	0.969072
52	0.974472	0.976436	0.973	0.972509	0.961217	0.966127	0.949926	0.944526	0.95189	0.959254	0.969072	0.961217	0.959745	0.963181	0.961217
53	0.977909	0.971527	0.979381	0.965636	0.970545	0.973981	0.959254	0.926853	0.964654	0.972509	0.960727	0.945017	0.958763	0.964654	0.97349
54	0.969563	0.964163	0.972509	0.980363	0.973	0.969563	0.958763	0.951399	0.958272	0.965636	0.960727	0.971527	0.97349	0.970054	0.964654
55	0.966127	0.977909	0.977418	0.96269	0.965636	0.980363	0.972018	0.945508	0.963181	0.947963	0.966618	0.966618	0.974963	0.967599	0.952381
56	0.982818	0.96269	0.977909	0.956308	0.962199	0.975454	0.954345	0.941581	0.954836	0.952872	0.96809	0.963672	0.957781	0.96809	0.963181
57	0.976436	0.966618	0.981345	0.974472	0.972018	0.969563	0.969563	0.934708	0.945508	0.948454	0.974472	0.971527	0.954345	0.963672	0.958763
58	0.977418	0.964654	0.982818	0.984291	0.970545	0.9838	0.963181	0.929308	0.954836	0.967599	0.932744	0.960236	0.979872	0.978891	0.968581
59	0.975454	0.971527	0.975945	0.972018	0.95729	0.971527	0.948454	0.949926	0.959745	0.961708	0.977909	0.966618	0.972509	0.961217	0.973981
60	0.977909	0.978891	0.975945	0.975454	0.975945	0.975945	0.974472	0.948945	0.964163	0.958763	0.96269	0.959745	0.977418	0.956308	0.957781
61	0.979381	0.975945	0.973	0.980363	0.955817	0.973	0.954345	0.946981	0.960236	0.96809	0.966618	0.959254	0.963672	0.961217	0.956308
62	0.983309	0.971036	0.979872	0.980854	0.961708	0.974963	0.958763	0.932744	0.93569	0.964163	0.97349	0.97349	0.961217	0.975945	0.971527
63	0.982818	0.976436	0.983309	0.979381	0.971036	0.976927	0.968581	0.965636	0.960727	0.966127	0.950417	0.966618	0.971036	0.965636	0.966618
64	0.981345	0.97349	0.968581	0.979872	0.973	0.978891	0.942563	0.948454	0.959745	0.970545	0.974472	0.965145	0.959745	0.970054	0.956799
65	0.983309	0.959745	0.980363	0.974472	0.959745	0.975454	0.960236	0.951399	0.959745	0.96269	0.965145	0.960236	0.977418	0.972018	0.970545
66	0.984782	0.982327	0.983309	0.974472	0.972018	0.97349	0.960727	0.938144	0.965145	0.967599	0.976436	0.973981	0.973981	0.972509	0.971527
67	0.975945	0.970545	0.975945	0.966127	0.965636	0.983309	0.96809	0.945508	0.955326	0.974963	0.984782	0.973981	0.97349	0.969563	0.964654
68	0.985763	0.980363	0.979872	0.979381	0.975945	0.974963	0.960236	0.958272	0.966127	0.969072	0.953854	0.966127	0.971527	0.965145	0.9784
69	0.969072	0.980363	0.9892	0.974472	0.975454	0.981836	0.950908	0.945999	0.969072	0.96269	0.951399	0.979872	0.970545	0.972509	0.969072
70	0.981836	0.973981	0.982327	0.980854	0.977909	0.990673	0.964163	0.967599	0.956308	0.957781	0.958272	0.979872	0.975454	0.974963	0.965636
71	0.975454	0.9784	0.984291	0.973981	0.960727	0.959254	0.963672	0.95189	0.947963	0.967599	0.963181	0.969072	0.949926	0.968581	0.959254
72	0.982327	0.974963	0.980363	0.982327	0.977418	0.974472	0.96809	0.940599	0.972018	0.975945	0.980854	0.976927	0.972018	0.970545	0.967108
73	0.981836	0.978891	0.980363	0.9838	0.976927	0.973	0.972509	0.951399	0.943544	0.973981	0.963672	0.977909	0.961708	0.975945	0.966618
74	0.9838	0.983309	0.972018	0.977909	0.981836	0.979872	0.965145	0.965636	0.947472	0.964163	0.964654	0.982327	0.975454	0.948945	0.966618
75	0.981836	0.979381	0.982818	0.974963	0.971527	0.968581	0.966618	0.943054	0.959254	0.975945	0.973	0.980363	0.972018	0.977909	0.962199
76	0.984291	0.973981	0.981345	0.973981	0.973	0.97349	0.969072	0.962199	0.957781	0.974472	0.940599	0.971527	0.953363	0.976927	0.975945
77	0.979381	0.97349	0.986254	0.985763	0.964654	0.982327	0.956308	0.946981	0.958763	0.96269	0.971036	0.981345	0.976927	0.972018	0.966127
78	0.981345	0.976927	0.983309	0.977909	0.966618	0.980363	0.967599	0.954345	0.956308	0.974963	0.973981	0.952872	0.982327	0.965145	0.974472
79	0.979381	0.966618	0.9784	0.971527	0.963672	0.982818	0.970054	0.965145	0.953854	0.97349	0.964654	0.976436	0.96269	0.967599	0.980854
80	0.980363	0.985272	0.984291	0.979872	0.971527	0.986254	0.976436	0.949435	0.974963	0.977418	0.972018	0.982818	0.975945	0.977418	0.970545
81	0.986254	0.981836	0.978891	0.971527	0.980363	0.981836	0.970545	0.952872	0.961217	0.975454	0.966127	0.965636	0.968581	0.9838	0.964163
82	0.991163	0.976436	0.984782	0.970054	0.975454	0.974963	0.97349	0.954836	0.945017	0.969563	0.9838	0.979872	0.966618	0.976436	0.972018
83	0.983309	0.976927	0.987236	0.967108	0.97349	0.984782	0.955326	0.958272	0.961217	0.961708	0.973981	0.958272	0.963181	0.971036	0.967108
84	0.978891	0.969563	0.987236	0.978891	0.981345	0.973	0.957781	0.958763	0.952381	0.981345	0.976436	0.970545	0.958272	0.971036	0.96809
85	0.983309	0.977909	0.976927	0.978891	0.966127	0.961708	0.967108	0.944035	0.953854	0.940599	0.972018	0.964654	0.980854	0.979872	0.966127
86	0.9838	0.976436	0.981345	0.983309	0.974963	0.992145	0.963672	0.954345	0.958272	0.974472	0.974472	0.969563	0.969563	0.977418	0.979872
87	0.982327	0.981345	0.982327	0.972509	0.977418	0.974963	0.971036	0.956308	0.958763	0.972018	0.982327	0.973981	0.961217	0.980363	0.972509
88	0.981345	0.9838	0.984291	0.969072	0.967599	0.988709	0.97349	0.954345	0.961217	0.965636	0.980854	0.981836	0.978891	0.976927	0.967108
89	0.984291	0.972509	0.984782	0.96809	0.982818	0.976436	0.973981	0.95729	0.964654	0.977909	0.979872	0.984291	0.972509	0.972018	0.966618
90	0.984291	0.985763	0.9892	0.989691	0.978891	0.987236	0.961708	0.95729	0.969072	0.975945	0.981836	0.985272	0.976927	0.973	0.972018
91	0.981345	0.979872	0.981836	0.982818	0.975454	0.979872	0.968581	0.958272	0.955817	0.97349	0.9838	0.972509	0.980363	0.974963	0.965145
92	0.985272	0.977909	0.980854	0.985272	0.974963	0.977418	0.96269	0.948945	0.95729	0.982818	0.979381	0.968581	0.972509	0.971527	0.981836
93	0.987727	0.983309	0.985763	0.9838	0.9784	0.967108	0.956799	0.966127	0.965145	0.966127	0.979381	0.985763	0.971527	0.969072	0.96809
94	0.986745	0.981345	0.987236	0.982327	0.982327	0.976436	0.971036	0.970545	0.95189	0.976436	0.985272	0.983309	0.979381	0.979381	0.961708
95	0.983309	0.986254	0.979381	0.981836	0.970054	0.987236	0.963181	0.969072	0.960236	0.977418	0.980854	0.979872	0.973	0.969072	0.976436
96	0.983309	0.979381	0.989691	0.978891	0.977909	0.986254	0.963181	0.957781	0.967599	0.982327	0.9784	0.977909	0.976927	0.977418	0.961708
97	0.987727	0.9838	0.984291	0.979381	0.972018	0.969563	0.972509	0.960727	0.96269	0.973	0.977909	0.970545	0.973981	0.970545	0.963181
98	0.984782	0.979872	0.977909	0.976436	0.962199	0.984291	0.973	0.964163	0.959745	0.977418	0.973981	0.978891	0.964654	0.972509	0.966618
99	0.977418	0.980854	0.981836	0.975454	0.976927	0.983309	0.963181	0.957781	0.95729	0.974963	0.975945	0.973	0.974963	0.977418	0.972509
100	0.9838	0.981345	0.981836	0.985763	0.976927	0.982327	0.972018	0.96809	0.966127	0.974963	0.972018	0.983309	0.963181	0.982818	0.966618
101	0.986745	0.987727	0.979872	0.977909	0.967108	0.983309	0.976436	0.974963	0.947472	0.975454	0.984291	0.982818	0.971036	0.975945	0.977909
102	0.9892	0.977418	0.988218	0.985763	0.974472	0.9892	0.967108	0.96809	0.965636	0.970545	0.974963	0.986254	0.977418	0.97349	0.975945
103	0.985763	0.986254	0.980363	0.976927	0.975945	0.982327	0.964654	0.963181	0.967108	0.973981	0.980854	0.981345	0.976927	0.975945	0.973
104	0.977909	0.9784	0.984291	0.983309	0.97349	0.985763	0.961708	0.963181	0.957781	0.976436	0.978891	0.986745	0.985272	0.976436	0.965145
105	0.980363	0.985272	0.982327	0.972018	0.980854	0.985763	0.960236	0.951399	0.956308	0.970054	0.980854	0.973981	0.982327	0.973981	0.976927
106	0.984782	0.986254	0.986254	0.987727	0.976927	0.980854	0.979872	0.964163	0.964654	0.985763	0.979381	0.976927	0.982818	0.969072	0.974472
107	0.9838	0.987727	0.981836	0.9784	0.975454	0.984291	0.974963	0.967108	0.945017	0.961217	0.981836	0.977909	0.961708	0.976436	0.972509
108	0.982818	0.9838	0.980363	0.972018	0.96269	0.981836	0.968581	0.949926	0.969072	0.976927	0.971527	0.983309	0.976436	0.9784	0.965145
109	0.985272	0.983309	0.9784	0.980854	0.981345	0.987236	0.972509	0.961217	0.968581	0.972509	0.982327	0.974963	0.976436	0.980854	0.972509
110	0.986745	0.9892	0.9838	0.980363	0.978891	0.981345	0.972509	0.965145	0.965145	0.984291	0.986745	0.975945	0.973981	0.981836	0.975454
111	0.985272	0.981836	0.982327	0.983309	0.981345	0.979872	0.970054	0.963181	0.972509	0.97349	0.984782	0.981345	0.967599	0.984291	0.972509
112	0.981836	0.984782	0.989691	0.981836	0.986254	0.97349	0.974472	0.959254	0.959745	0.974963	0.976436	0.986254	0.979872	0.980363	0.969563
113	0.985763	0.986254	0.991654	0.980854	0.973	0.988218	0.977418	0.96269	0.970054	0.982818	0.974963	0.966618	0.974472	0.973	0.980854
114	0.982818	0.982327	0.984291	0.984291	0.975454	0.984782	0.97349	0.954345	0.966618	0.980363	0.974472	0.982818	0.977418	0.9838	0.961708
115	0.983309	0.985272	0.978891	0.986745	0.974472	0.984291	0.966618	0.971527	0.970054	0.972018	0.980363	0.9784	0.972018	0.974472	0.969072
116	0.988709	0.983309	0.983309	0.978891	0.983309	0.988218	0.971036	0.96809	0.961708	0.972509	0.980854	0.980854	0.974963	0.983309	0.981836
117	0.982818	0.984291	0.987236	0.977909	0.9838	0.978891	0.975454	0.963181	0.953854	0.980363	0.981345	0.981836	0.976436	0.984291	0.966127
118	0.985272	0.985272	0.982818	0.984782	0.984782	0.9892	0.977418	0.970054	0.961217	0.974963	0.983309	0.9784	0.982818	0.986745	0.975454
119	0.938635	0.966127	0.967599	0.979872	0.96809	0.979872	0.95729	0.96269	0.975454	0.933726	0.951399	0.972509	0.960727	0.980854	0.972018
120	0.986745	0.986254	0.979872	0.976927	0.975945	0.969563	0.973981	0.959254	0.929799	0.969072	0.981345	0.958272	0.967599	0.980854	0.973
121	0.977418	0.979872	0.982327	0.975454	0.959745	0.966127	0.970545	0.971036	0.95729	0.978891	0.955817	0.973981	0.971036	0.972509	0.955817
122	0.986745	0.972509	0.97349	0.977909	0.988218	0.964654	0.969563	0.949926	0.954345	0.966127	0.971036	0.983309	0.956308	0.975454	0.968581
123	0.977909	0.983309	0.9838	0.973981	0.981836	0.963181	0.977909	0.958272	0.965145	0.982818	0.980363	0.979872	0.936181	0.977418	0.96809
124	0.987727	0.984291	0.986254	0.983309	0.97349	0.979872	0.975454	0.967599	0.975454	0.984291	0.972509	0.975454	0.917526	0.972018	0.965636
125	0.991163	0.982818	0.988218	0.961217	0.986745	0.9784	0.980363	0.963181	0.972018	0.981836	0.981345	0.986745	0.980854	0.981836	0.972018
126	0.985763	0.986254	0.985272	0.978891	0.979381	0.984782	0.965636	0.972509	0.968581	0.980363	0.981345	0.981836	0.984782	0.977418	0.977418
127	0.988218	0.982818	0.985763	0.980363	0.984291	0.981836	0.966618	0.971036	0.94649	0.981836	0.977418	0.962199	0.979381	0.981345	0.977418
128	0.987236	0.978891	0.991163	0.979381	0.983309	0.994109	0.976927	0.961217	0.966127	0.979872	0.970545	0.9784	0.97349	0.979872	0.983309
129	0.982327	0.985763	0.988218	0.969563	0.986745	0.97349	0.973981	0.959745	0.962199	0.979381	0.979381	0.984782	0.974472	0.981345	0.976436
130	0.988218	0.9892	0.976436	0.990182	0.986254	0.980854	0.975945	0.941581	0.972018	0.975454	0.987727	0.973	0.984291	0.985272	0.97349
131	0.989691	0.988218	0.981836	0.980854	0.979381	0.990673	0.975945	0.964654	0.970054	0.977418	0.988709	0.980854	0.979872	0.981345	0.978891
132	0.987236	0.982327	0.989691	0.9892	0.974472	0.9838	0.976436	0.960727	0.972018	0.987236	0.982327	0.976927	0.973981	0.977909	0.979381
133	0.984782	0.986745	0.987236	0.986745	0.981345	0.9838	0.976927	0.965145	0.966618	0.982818	0.977909	0.974472	0.974963	0.981345	0.984782
134	0.985763	0.984782	0.979381	0.968581	0.980363	0.985763	0.965145	0.96809	0.981345	0.982818	0.974472	0.966127	0.982327	0.985272	0.978891
135	0.986254	0.979381	0.990673	0.9892	0.985272	0.985763	0.964654	0.966618	0.960727	0.977909	0.980854	0.978891	0.979381	0.9838	0.976927
136	0.975945	0.983309	0.980363	0.982818	0.969563	0.990182	0.969563	0.964163	0.965145	0.982327	0.982327	0.985763	0.970054	0.9838	0.978891
137	0.986745	0.988709	0.987236	0.981836	0.9784	0.987727	0.978891	0.963672	0.978891	0.973981	0.983309	0.9838	0.979381	0.976436	0.980854
138	0.985272	0.986254	0.991654	0.979872	0.987236	0.987236	0.966127	0.961217	0.975945	0.9838	0.983309	0.984291	0.9784	0.984291	0.971527
139	0.983309	0.985763	0.987236	0.9784	0.9784	0.987727	0.977909	0.954836	0.961708	0.977418	0.965145	0.976927	0.969563	0.982818	0.967599
140	0.985272	0.9892	0.991163	0.982818	0.988709	0.987727	0.977418	0.976436	0.96809	0.979381	0.974472	0.983309	0.977418	0.982818	0.977909
141	0.984782	0.990182	0.984291	0.988218	0.974472	0.986745	0.977909	0.97349	0.970545	0.986745	0.985763	0.985763	0.9784	0.981345	0.981836
142	0.990182	0.984291	0.983309	0.983309	0.989691	0.984291	0.976436	0.967108	0.965145	0.987236	0.977418	0.987727	0.987727	0.980363	0.962199
143	0.984291	0.981345	0.986254	0.987236	0.972509	0.986254	0.976927	0.972018	0.967599	0.97349	0.9838	0.989691	0.987727	0.979872	0.980363
144	0.984782	0.988218	0.986254	0.986745	0.979381	0.986254	0.971036	0.965145	0.977418	0.989691	0.9892	0.981345	0.974963	0.975945	0.982327
145	0.989691	0.985763	0.9838	0.977909	0.976927	0.984291	0.974472	0.974963	0.972018	0.986745	0.982818	0.983309	0.978891	0.966127	0.982818
146	0.988709	0.985763	0.980363	0.984291	0.984291	0.989691	0.977909	0.969563	0.973	0.986745	0.984782	0.971527	0.986745	0.976436	0.973981
147	0.9838	0.985272	0.986745	0.988709	0.982818	0.987727	0.96809	0.967599	0.976436	0.982327	0.979381	0.984291	0.973981	0.974963	0.979872
148	0.989691	0.986254	0.986254	0.985272	0.9838	0.988709	0.973981	0.963181	0.969072	0.988709	0.970545	0.985763	0.972509	0.984782	0.986254
149	0.990182	0.9838	0.986745	0.987727	0.983309	0.9838	0.969072	0.966127	0.982327	0.992145	0.9838	0.986254	0.982327	0.987236	0.981836
150	0.984291	0.990673	0.9892	0.978891	0.980854	0.991654	0.972509	0.953363	0.971036	0.980363	0.981836	0.986254	0.9784	0.975454	0.982818
151	0.971036	0.985763	0.986745	0.9892	0.984782	0.989691	0.973981	0.966127	0.974963	0.987236	0.984782	0.992145	0.976927	0.986745	0.975945
152	0.985272	0.9892	0.991163	0.982327	0.983309	0.990182	0.971527	0.969563	0.970545	0.988218	0.981836	0.981836	0.974963	0.988709	0.976927
153	0.987236	0.985272	0.993127	0.981836	0.986745	0.986745	0.980854	0.951399	0.975945	0.979381	0.980363	0.979872	0.979381	0.987236	0.986254
154	0.985272	0.987236	0.986254	0.974472	0.986745	0.986254	0.968581	0.974963	0.971527	0.987727	0.973	0.989691	0.984291	0.984782	0.984291
155	0.988709	0.990673	0.982818	0.987236	0.986745	0.990673	0.976436	0.955817	0.974963	0.985763	0.987236	0.992145	0.984782	0.986254	0.9838
156	0.991163	0.985763	0.990673	0.981345	0.991163	0.984782	0.973	0.960236	0.967599	0.989691	0.985272	0.983309	0.984782	0.981345	0.982818
157	0.988709	0.9892	0.991654	0.985763	0.992145	0.990182	0.974472	0.956308	0.975454	0.984782	0.9838	0.982818	0.982818	0.977418	0.984291
158	0.989691	0.987727	0.987236	0.979872	0.983309	0.992145	0.980363	0.980363	0.965636	0.981836	0.987236	0.985272	0.981345	0.969072	0.969072
159	0.987236	0.988218	0.985763	0.985763	0.982818	0.982818	0.955326	0.956308	0.9784	0.987236	0.977909	0.9838	0.972018	0.979381	0.985272
160	0.984291	0.9838	0.988709	0.991163	0.985763	0.988218	0.966127	0.962199	0.974963	0.990182	0.987727	0.982327	0.988218	0.988709	0.984782
161	0.988218	0.989691	0.986745	0.988218	0.9838	0.988709	0.965145	0.958272	0.974963	0.986254	0.981345	0.986745	0.982327	0.985272	0.988218
162	0.989691	0.9838	0.987236	0.9892	0.986254	0.983309	0.974963	0.949435	0.970054	0.985763	0.9892	0.9784	0.9838	0.990182	0.983309
163	0.989691	0.992145	0.985763	0.988218	0.987727	0.9784	0.981836	0.96269	0.974472	0.985763	0.979872	0.978891	0.975945	0.981345	0.984291
164	0.9892	0.991163	0.990182	0.980854	0.978891	0.991163	0.960727	0.974963	0.979381	0.994109	0.984291	0.987727	0.985272	0.984782	0.982818
165	0.989691	0.9892	0.985763	0.9892	0.985763	0.991163	0.973	0.969563	0.976927	0.986745	0.980854	0.991163	0.980854	0.987727	0.981836
166	0.988218	0.986745	0.994109	0.991654	0.9784	0.987236	0.965145	0.970545	0.9784	0.985763	0.971527	0.985763	0.989691	0.983309	0.979872
167	0.990182	0.990673	0.988218	0.979381	0.988709	0.991163	0.978891	0.959254	0.97349	0.993618	0.984782	0.986745	0.982327	0.982818	0.97349
168	0.991163	0.988709	0.988218	0.988218	0.991654	0.990673	0.978891	0.964163	0.969072	0.985272	0.991654	0.991163	0.9838	0.990182	0.990182
169	0.990673	0.990673	0.991654	0.984291	0.984291	0.979872	0.974472	0.965636	0.965636	0.981836	0.981345	0.991654	0.977418	0.988218	0.9784
170	0.988709	0.988218	0.988709	0.991163	0.981345	0.982327	0.980363	0.965145	0.974963	0.988709	0.984782	0.979872	0.980854	0.978891	0.986254
171	0.980363	0.9892	0.989691	0.985763	0.983309	0.979381	0.975945	0.947472	0.981345	0.980854	0.982818	0.991654	0.986745	0.980363	0.975454
172	0.992145	0.987727	0.988709	0.982818	0.987236	0.989691	0.9784	0.965145	0.97349	0.991163	0.987727	0.9946	0.97349	0.987727	0.979381
173	0.987236	0.985763	0.994109	0.987236	0.986254	0.9784	0.97349	0.967108	0.975945	0.989691	0.978891	0.987236	0.986745	0.980854	0.972509
174	0.990673	0.986745	0.986745	0.991654	0.9892	0.990673	0.969072	0.95729	0.9838	0.990182	0.987236	0.985272	0.979872	0.988709	0.988709
175	0.990673	0.991654	0.988218	0.986254	0.986254	0.992145	0.9784	0.959254	0.979872	0.979381	0.988218	0.990182	0.985763	0.979381	0.9838
176	0.992145	0.9892	0.987727	0.990182	0.984291	0.992636	0.964654	0.957781	0.974472	0.987236	0.984782	0.992145	0.9838	0.980854	0.9892
177	0.990673	0.9838	0.987727	0.9838	0.988709	0.991654	0.980363	0.962199	0.9784	0.993127	0.991163	0.990182	0.981836	0.982327	0.984782
178	0.986254	0.984291	0.985272	0.990182	0.992636	0.994109	0.974472	0.971036	0.982327	0.977909	0.988709	0.992145	0.982818	0.982327	0.987236
179	0.9946	0.9892	0.9892	0.991654	0.987236	0.985272	0.967108	0.956799	0.979381	0.979872	0.984782	0.991654	0.9838	0.985763	0.971036
180	0.986745	0.986745	0.9892	0.9892	0.988709	0.989691	0.9838	0.966127	0.975454	0.984291	0.9838	0.985763	0.985272	0.984291	0.967599
181	0.991654	0.988218	0.988709	0.988218	0.995582	0.990182	0.974963	0.963181	0.968581	0.988709	0.982327	0.986254	0.986745	0.983309	0.982818
182	0.988218	0.991163	0.988709	0.990182	0.985763	0.991163	0.972018	0.971036	0.974472	0.979381	0.982327	0.9946	0.9838	0.976436	0.987727
183	0.988709	0.986254	0.991163	0.981345	0.9838	0.992145	0.981345	0.976436	0.985763	0.991163	0.983309	0.991163	0.985272	0.983309	0.979872
184	0.991163	0.993127	0.987727	0.986745	0.991163	0.980363	0.979381	0.972018	0.978891	0.987727	0.976927	0.993127	0.982818	0.988218	0.988218
185	0.990182	0.989691	0.985763	0.986745	0.990673	0.990182	0.974963	0.975945	0.981345	0.988218	0.984291	0.991654	0.986254	0.981836	0.990182
186	0.991654	0.986254	0.988218	0.988218	0.979381	0.987727	0.971527	0.974472	0.973	0.987727	0.9838	0.993618	0.984782	0.988218	0.984291
187	0.987727	0.9892	0.9892	0.985763	0.984782	0.9838	0.979381	0.974472	0.977418	0.985272	0.9784	0.993127	0.983309	0.987727	0.984291
188	0.991163	0.987236	0.996073	0.990673	0.990673	0.9892	0.973	0.97349	0.982327	0.986745	0.984782	0.990673	0.984782	0.9892	0.983309
189	0.986254	0.987236	0.991654	0.991163	0.988218	0.991163	0.972509	0.985272	0.973981	0.990673	0.987727	0.989691	0.975945	0.981345	0.9838
190	0.989691	0.990182	0.990673	0.991654	0.988218	0.990673	0.972018	0.97349	0.979381	0.982818	0.979381	0.984782	0.985763	0.986254	0.986254
191	0.986254	0.987236	0.9892	0.989691	0.983309	0.989691	0.974472	0.985272	0.976927	0.988218	0.992636	0.9892	0.984291	0.982818	0.988218
192	0.988709	0.9838	0.995582	0.992636	0.9892	0.990182	0.977909	0.977909	0.970545	0.991163	0.982327	0.991654	0.983309	0.9892	0.988218
193	0.988709	0.991654	0.990673	0.992145	0.982327	0.993127	0.967108	0.976436	0.9838	0.990673	0.984291	0.990182	0.984782	0.979381	0.9838
194	0.9946	0.995582	0.986745	0.985763	0.991654	0.988709	0.964654	0.972018	0.977909	0.9892	0.990182	0.990182	0.985272	0.986254	0.981836
195	0.990182	0.984782	0.988218	0.991163	0.993127	0.992145	0.967108	0.972018	0.9838	0.987236	0.988218	0.990182	0.990182	0.987727	0.987727
196	0.992145	0.990673	0.990673	0.980363	0.988218	0.988709	0.962199	0.971036	0.973	0.992145	0.987727	0.986254	0.987236	0.986254	0.984782
197	0.990182	0.9892	0.984782	0.988709	0.986745	0.985763	0.971527	0.971036	0.973981	0.988709	0.988218	0.994109	0.988709	0.984782	0.980854
198	0.993618	0.990673	0.990673	0.991654	0.993618	0.9892	0.976436	0.962199	0.979381	0.991163	0.986745	0.992145	0.985272	0.983309	0.982327
199	0.988709	0.988218	0.991654	0.985272	0.9892	0.992636	0.976436	0.973981	0.981836	0.988709	0.9838	0.990182	0.985763	0.988218	0.978891
200	0.990673	0.991163	0.9892	0.990673	0.983309	0.986254	0.978891	0.97349	0.980854	0.987727	0.991654	0.992145	0.978891	0.987236	0.992636

## Sheet: MNISTBinaryBS25
	EI_BS25_Acc_Exp1	EI_BS25_Acc_Exp2	EI_BS25_Acc_Exp3	MaxEnt_BS25_Acc_Exp1	MaxEnt_BS25_Acc_Exp2	MaxEnt_BS25_Acc_Exp3	Rand_BS25_Acc_Exp1	Rand_BS25_Acc_Exp2	Rand_BS25_Acc_Exp3	BatchBALD_BS25_Acc_Exp1	BatchBALD_BS25_Acc_Exp2	BatchBALD_BS25_Acc_Exp3	Coreset_BS25_Acc_Exp1	Coreset_BS25_Acc_Exp2	Coreset_BS25_Acc_Exp3
0	0.818851	0.840943	0.830633	0.853706	0.859597	0.725577	0.806087	0.82867	0.87678	0.889053	0.77516	0.881198	0.86107	0.836033	0.849779
1	0.961708	0.916053	0.933726	0.932744	0.897398	0.932253	0.928326	0.905744	0.920962	0.948454	0.913598	0.94109	0.945508	0.913108	0.923908
2	0.9784	0.959254	0.958272	0.973981	0.973	0.960236	0.932744	0.932253	0.927344	0.95729	0.955326	0.955326	0.947472	0.94649	0.945017
3	0.974963	0.9784	0.972018	0.976927	0.979872	0.976927	0.943054	0.968581	0.926853	0.972509	0.964654	0.972018	0.951399	0.973	0.951399
4	0.976927	0.982818	0.980363	0.984782	0.975945	0.974472	0.93569	0.976927	0.947963	0.960236	0.967599	0.983309	0.972018	0.970545	0.969072
5	0.987727	0.980854	0.986745	0.975454	0.9838	0.967108	0.965636	0.97349	0.947963	0.963181	0.970545	0.979381	0.964163	0.972018	0.948454
6	0.988709	0.986745	0.982818	0.988218	0.986745	0.979872	0.953854	0.976927	0.965145	0.990182	0.984291	0.981836	0.970054	0.980854	0.972509
7	0.985763	0.992145	0.986254	0.987236	0.988709	0.990673	0.965636	0.975945	0.974472	0.988709	0.986745	0.984291	0.961708	0.973	0.979872
8	0.990182	0.990182	0.988218	0.988709	0.973	0.981345	0.982327	0.980363	0.967108	0.991163	0.988709	0.975454	0.975454	0.973	0.965145
9	0.985763	0.990182	0.989691	0.988218	0.977909	0.993127	0.975945	0.985272	0.974963	0.985272	0.984782	0.990673	0.977418	0.981836	0.972509
10	0.991163	0.986254	0.992636	0.993127	0.986254	0.986745	0.982327	0.981836	0.976436	0.972509	0.987727	0.990673	0.977418	0.982327	0.961708
11	0.991163	0.994109	0.990182	0.9946	0.993127	0.991163	0.981836	0.985272	0.976927	0.986254	0.992636	0.990182	0.970545	0.985272	0.9838
12	0.993127	0.990673	0.995091	0.987236	0.986745	0.996073	0.986745	0.982327	0.981345	0.995091	0.992636	0.992145	0.979381	0.983309	0.982818
13	0.993127	0.996073	0.991654	0.991163	0.9946	0.996073	0.9892	0.984291	0.984782	0.990673	0.992145	0.989691	0.980363	0.986254	0.9838
14	0.995582	0.990673	0.994109	0.990182	0.992145	0.991163	0.983309	0.990182	0.988709	0.989691	0.991163	0.994109	0.983309	0.985272	0.982818
15	0.990182	0.991163	0.994109	0.986745	0.993127	0.992145	0.977418	0.987236	0.983309	0.9892	0.987236	0.995091	0.984291	0.986254	0.977418
16	0.990673	0.994109	0.9946	0.995582	0.988218	0.990673	0.984782	0.9892	0.987236	0.994109	0.993618	0.991654	0.984782	0.990673	0.984291
17	0.995091	0.996073	0.9946	0.996073	0.9946	0.995091	0.988218	0.9892	0.984291	0.994109	0.993618	0.993127	0.985763	0.990182	0.987727
18	0.996073	0.9946	0.996073	0.990673	0.994109	0.996073	0.990673	0.984782	0.988709	0.995582	0.993618	0.992145	0.990673	0.9892	0.984782
19	0.993618	0.9946	0.993127	0.995582	0.994109	0.987236	0.987236	0.986254	0.987727	0.995091	0.997054	0.996564	0.989691	0.991163	0.987727
20	0.991163	0.994109	0.995582	0.995091	0.993127	0.990673	0.990673	0.984291	0.986254	0.991163	0.995091	0.9946	0.986745	0.992636	0.988218

## Sheet: MNISTMultiClassBS100
	EI_BS100_Acc_Exp1	EI_BS100_Acc_Exp2	EI_BS100_Acc_Exp3	MaxEnt_BS100_Acc_Exp1	MaxEnt_BS100_Acc_Exp2	MaxEnt_BS100_Acc_Exp3	Rand_BS100_Acc_Exp1	Rand_BS100_Acc_Exp2	Rand_BS100_Acc_Exp3	BatchBALD_BS100_Acc_Exp1	BatchBALD_BS100_Acc_Exp2	BatchBALD_BS100_Acc_Exp3	Coreset_BS100_Acc_Exp1	Coreset_BS100_Acc_Exp2	Coreset_BS100_Acc_Exp3
0	0.5275	0.5281	0.5925	0.6167	0.5375	0.5811	0.5642	0.5645	0.6029	0.6186	0.5557	0.5274	0.5145	0.5881	0.5957
1	0.7633	0.7734	0.7754	0.6647	0.7912	0.7962	0.8049	0.794	0.7235	0.7692	0.7638	0.7877	0.8212	0.7893	0.8317
2	0.8778	0.8731	0.8647	0.8397	0.8121	0.8656	0.8581	0.8431	0.8622	0.8583	0.8735	0.8785	0.8602	0.89	0.8833
3	0.8882	0.9095	0.8987	0.8631	0.9022	0.8887	0.8845	0.8786	0.8905	0.8957	0.8974	0.9045	0.8907	0.911	0.905
4	0.929	0.9119	0.9282	0.8944	0.906	0.8985	0.911	0.8836	0.916	0.9069	0.931	0.923	0.8992	0.9042	0.9032
5	0.9199	0.9067	0.9097	0.9204	0.9264	0.9177	0.9183	0.9115	0.9101	0.9354	0.9363	0.9376	0.9266	0.9218	0.9162
6	0.941	0.9335	0.929	0.9422	0.9245	0.9369	0.9253	0.9257	0.9351	0.9239	0.9225	0.9327	0.9213	0.9223	0.928
7	0.937	0.9389	0.9474	0.9286	0.9336	0.9304	0.9239	0.9392	0.926	0.9497	0.9449	0.9384	0.9268	0.9341	0.9333
8	0.9414	0.9427	0.9372	0.9324	0.9401	0.9349	0.9344	0.9469	0.9408	0.9518	0.9396	0.9568	0.9402	0.9459	0.9375
9	0.9435	0.9458	0.9388	0.9498	0.9604	0.9425	0.9397	0.9274	0.9438	0.9458	0.9358	0.95	0.9417	0.9441	0.9408
10	0.9596	0.9622	0.9418	0.961	0.9365	0.9499	0.9399	0.94	0.947	0.947	0.9494	0.9572	0.9379	0.9413	0.9471
